# Supplementary material for: A simple, sustainable route to flexible microporous carbon cloth for energy storage applications
Source: Royal Society of Chemistry journal article supplement (doi:10.1039/d3ma00157a), 2023-01-01
Supplement: d3ma00157a1.pdf [file d3ma00157a1.pdf]

Supplementary Information for  
**A simple, sustainable route to flexible  
microporous carbon cloth for energy storage  
applications**

Thria Alkhaldi <sup>a, b</sup>, L. Scott Blankenship <sup>a</sup>, and Robert Mokaya <sup>a</sup>

\* E-Mail: [r.mokaya@nottingham.ac.uk](mailto:r.mokaya@nottingham.ac.uk)

<sup>a</sup>School of Chemistry, University of Nottingham, University Park, Nottingham, NG7 2RD, UK.

<sup>b</sup>Department of Chemistry, Jeddah University, Jeddah 23442, Saudi Arabia

# 1. Synthesis

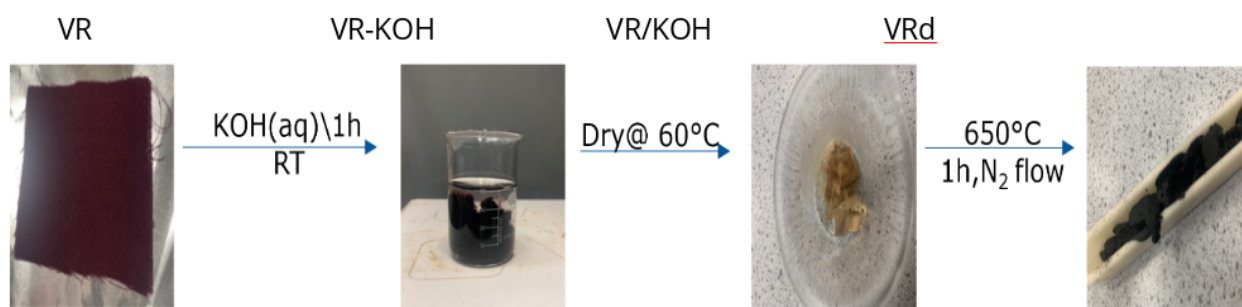

Fig. S1: Steps in the direct activation of viscose rayon (VR) with KOH. This process yields powdered activated carbon.

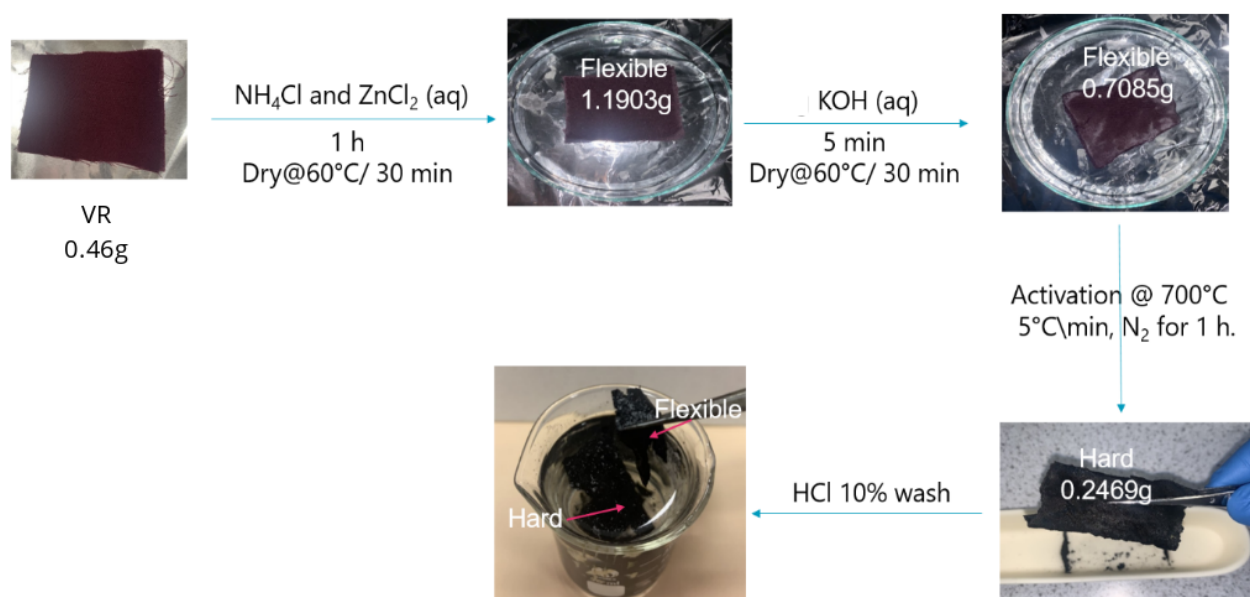

Fig. S2: Steps in the stabilisation of viscose rayon (VR) with NH<sub>4</sub>Cl and ZnCl<sub>2</sub> prior to activation with KOH. This process yields both hard (powdered) and flexible activated carbon.

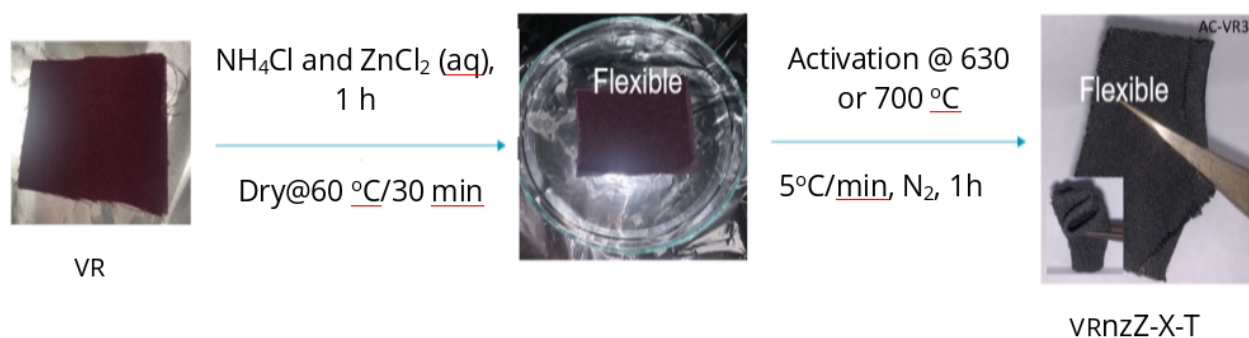

**Fig. S3:** Steps in the stabilisation of viscose rayon (VR) with  $\text{NH}_4\text{Cl}$  and  $\text{ZnCl}_2$  prior to thermal treatment to facilitate activation with the latter ( $\text{ZnCl}_2$ ). This process yields flexible activated carbon cloth - series VRnzZ-X-T.

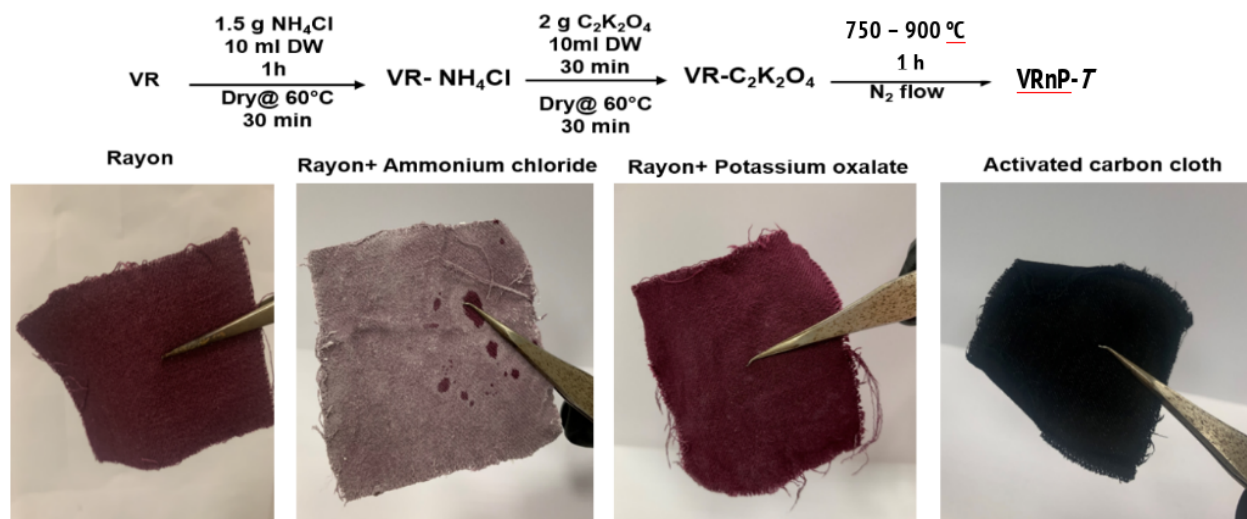

**Fig. S4:** Steps in the stabilisation of viscose rayon (VR) with  $\text{NH}_4\text{Cl}$  only followed by activation with PO. This process yields flexible activated carbon cloth - series VRnP-T.

## 2. Powder X-ray Diffraction

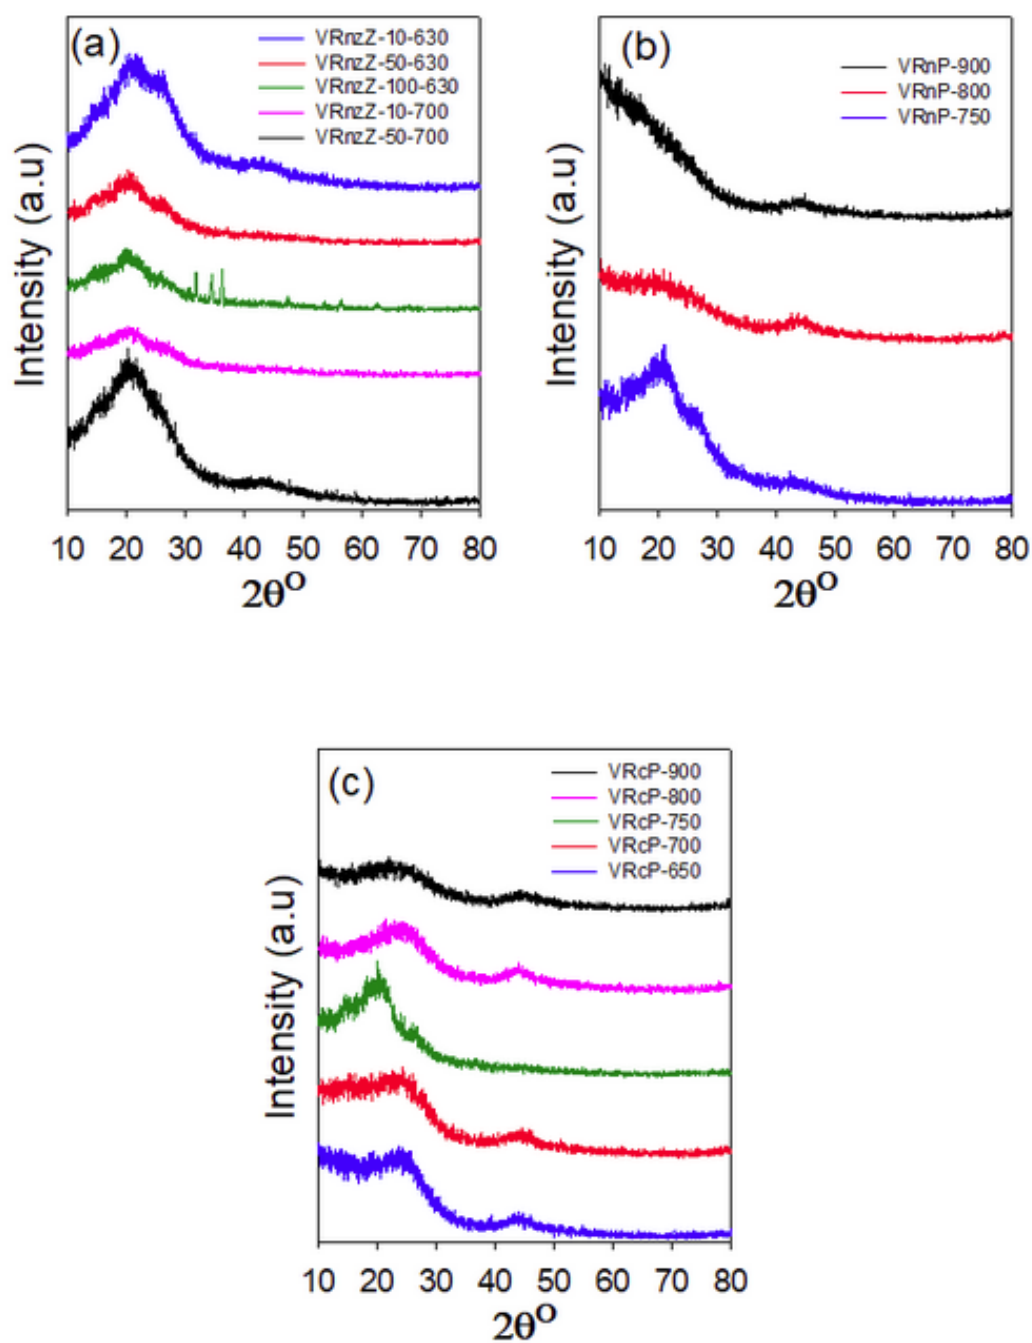

Fig. S5: XRD patterns of flexible VR-derived ACCs; (a) series VRnzZ-X-T, (b) series VRnP-T, and (c) series VRcP-T.

### 3. Thermogravimetric Analysis

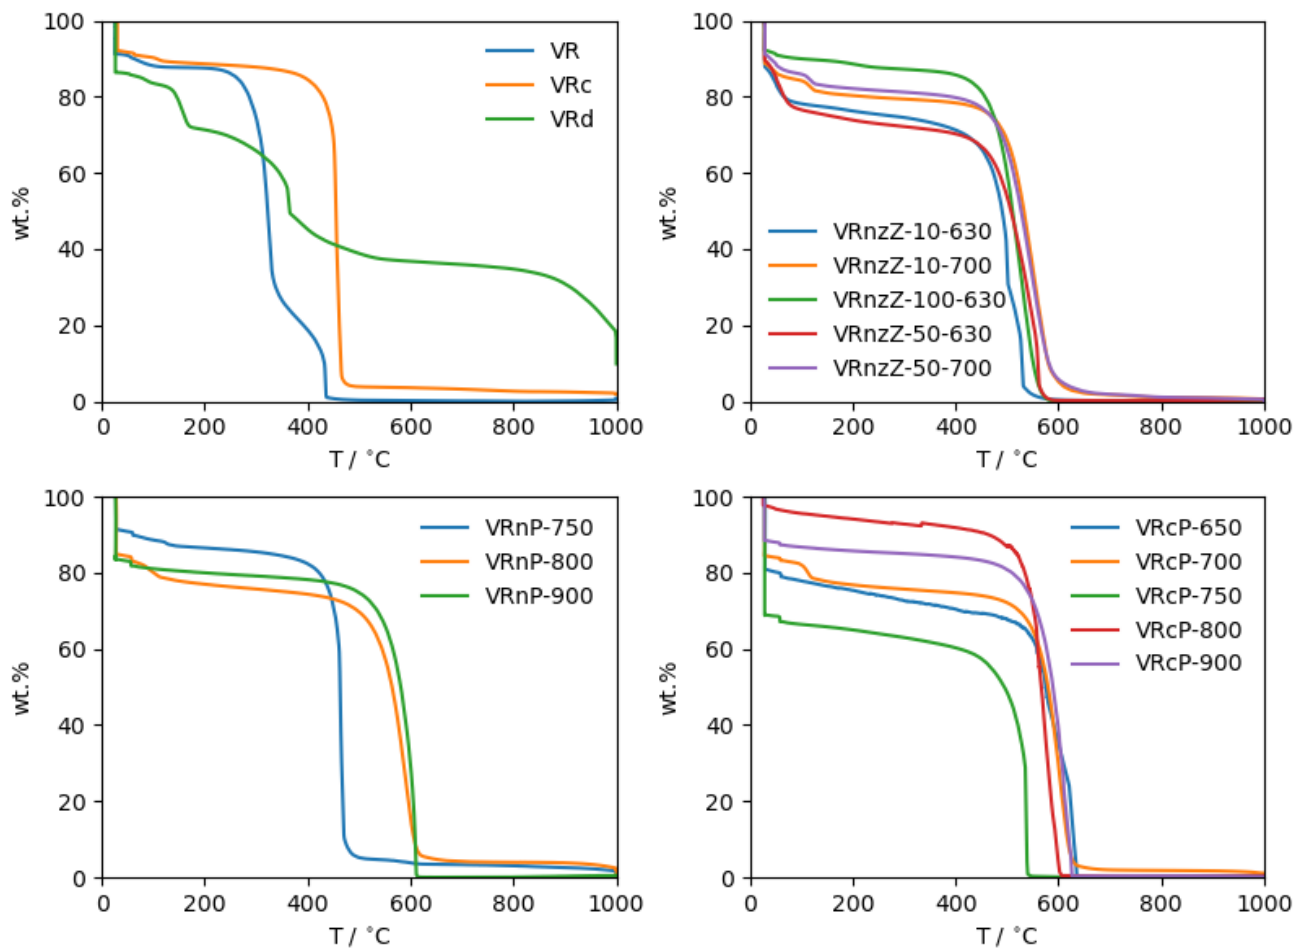

Fig. S6: TGA curves of VR, powdered carbons and flexible ACCs synthesised in this work.

#### 4. Scanning electron Microscopy

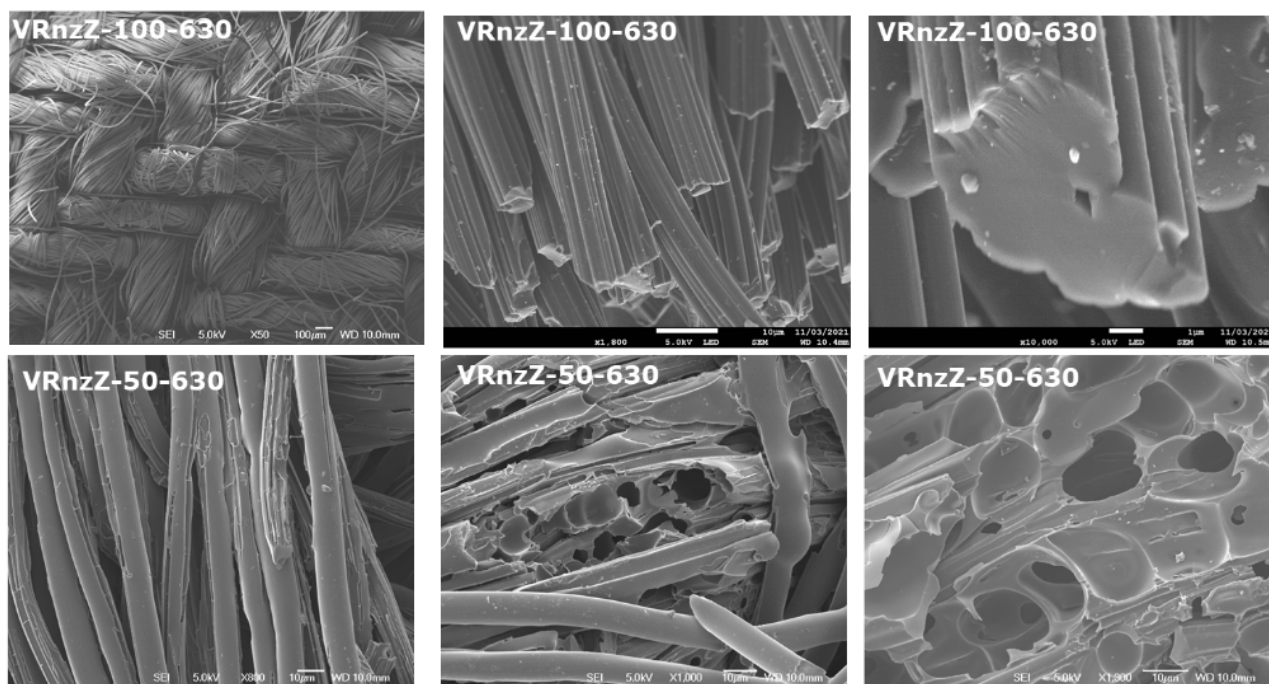

Fig. S7: SEM images of series VRnzZ-X-T flexible VR-derived ACCs activated at 630 °C.

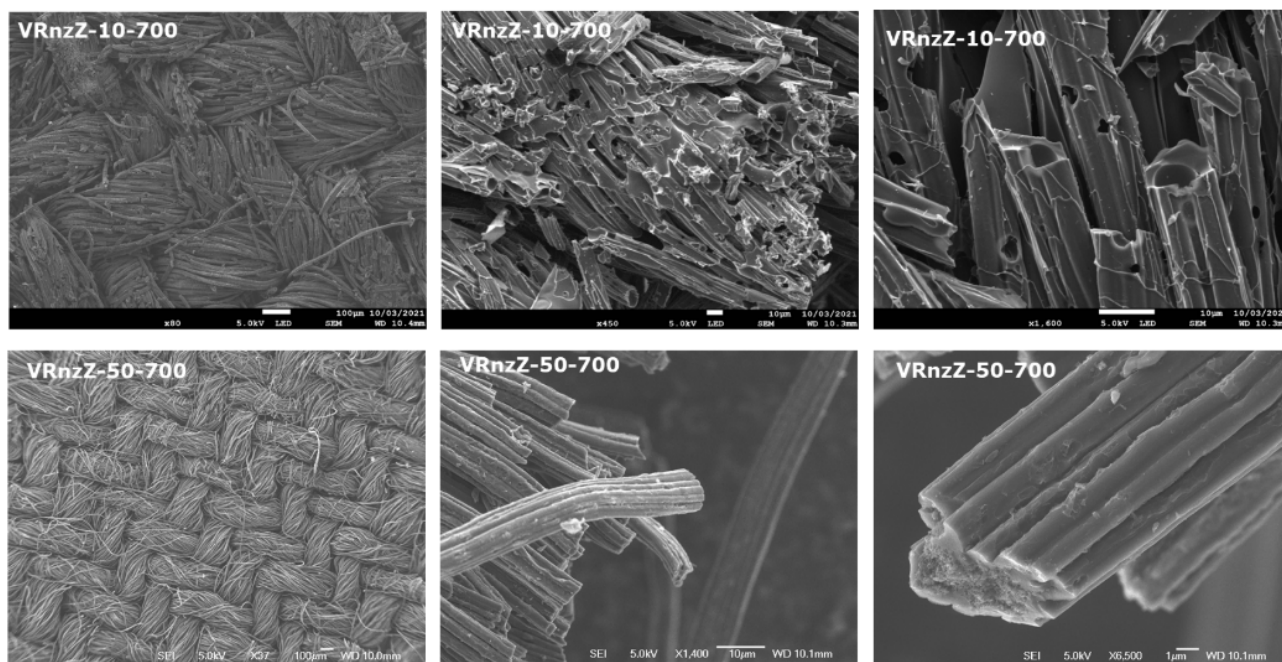

Fig. S8: SEM images of series VRnzZ-X-T flexible VR-derived ACCs activated at 700 °C.



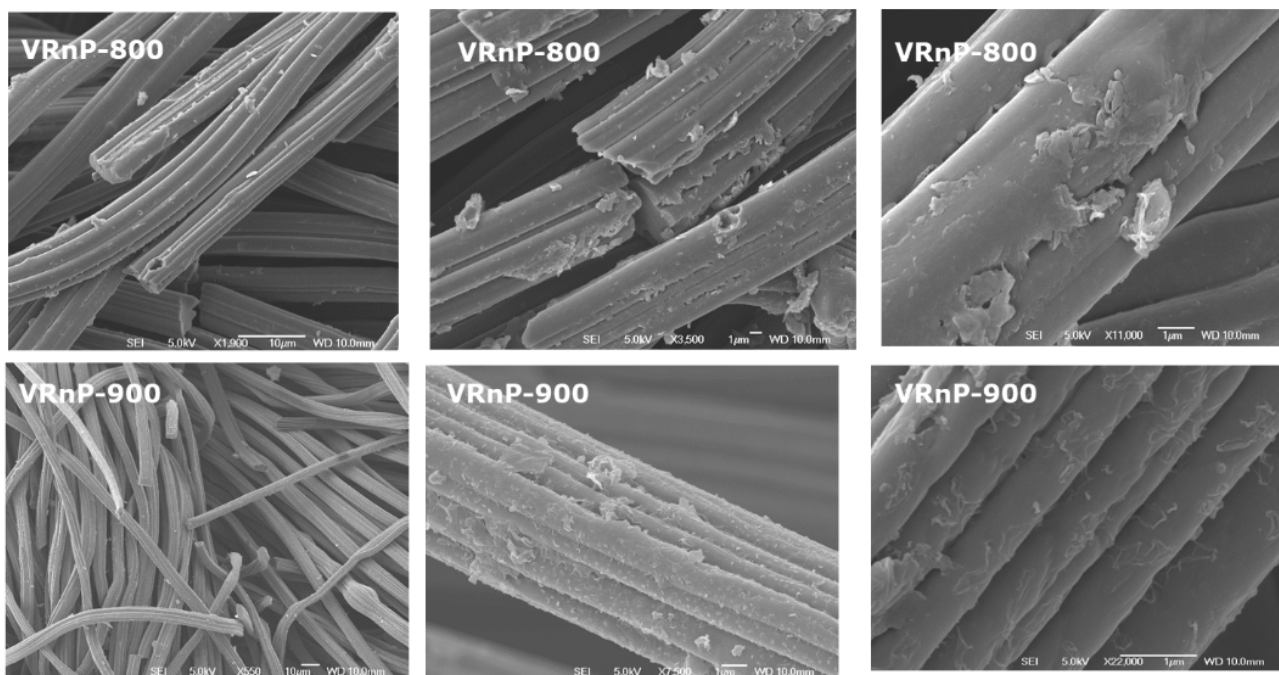

Fig. S9: SEM images of VRnP-*T* flexible VR-derived ACCs.

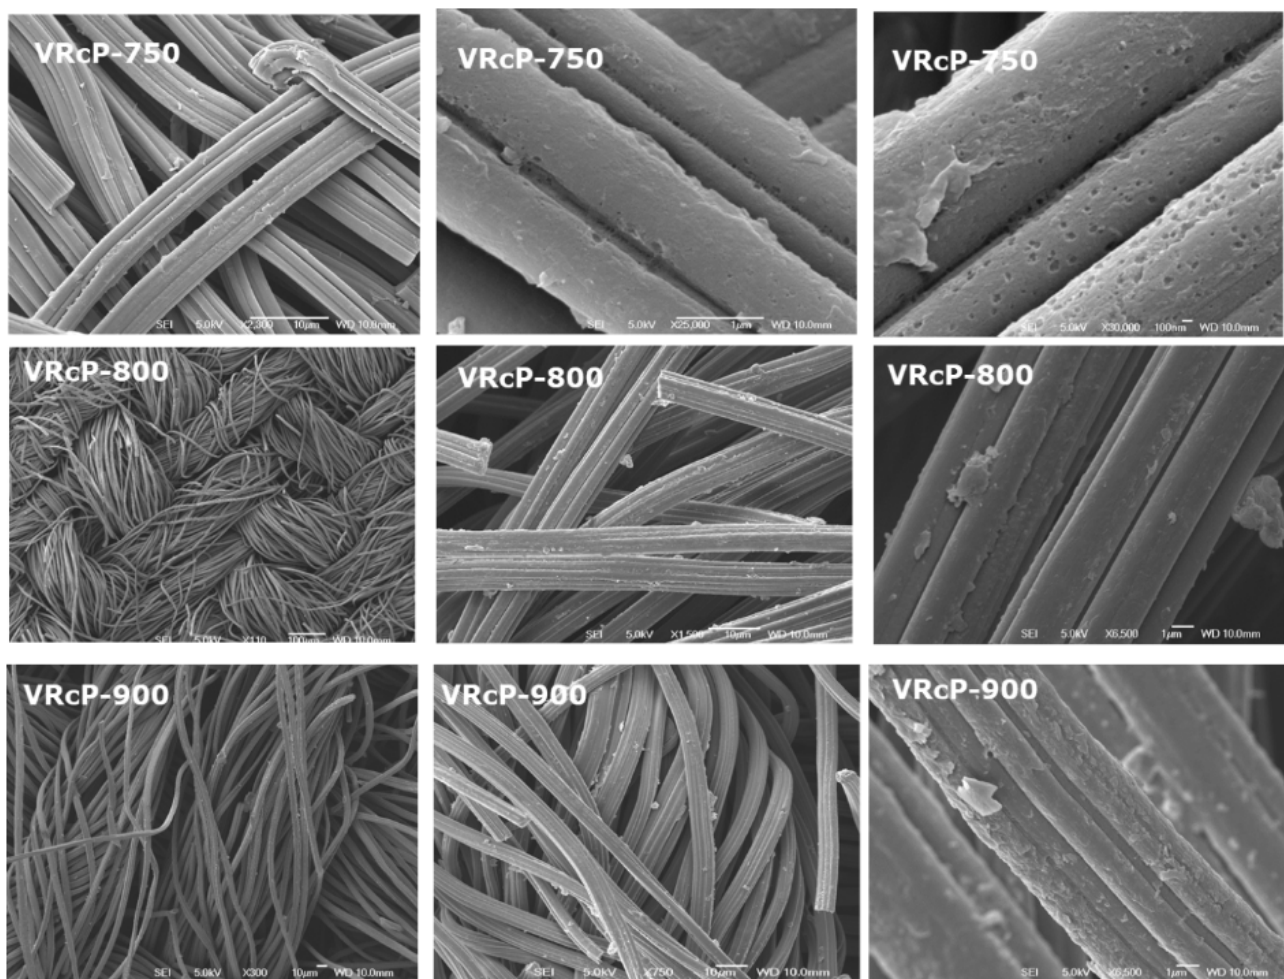

Fig. S10: SEM images of series VRcP-*T* flexible VR-derived ACCs

## 5. Isotherm measurement conditions

**Table S1:** Conditions used for measuring  $N_2$  isotherms for porosimetry. Pressure points either controlled by initial and final relative pressure, a relative pressure increment or quantity of gas dosed. Equilibration time ( $t_E$ ) was higher at low pressures due to equilibration issues in small pores.<sup>S1</sup>

| $P/P_0$ initial | $P/P_0$ increment | dose / $\text{cm}^3 \text{g}^{-1} \text{stp}$ | $t_E$ / s | $P/P_0$ final |
|-----------------|-------------------|-----------------------------------------------|-----------|---------------|
| 0.00e+00        |                   | 10                                            | 45        | 4.00e-04      |
| 4.00e-04        |                   | 25                                            | 35        | 1.00e-01      |
| 1.00e-01        | 0.05              |                                               | 10        | 1.50e-01      |
| 1.50e-01        | 0.05              |                                               | 10        | 2.00e-01      |
| 2.00e-01        | 0.05              |                                               | 10        | 2.50e-01      |
| 2.50e-01        | 0.05              |                                               | 10        | 3.00e-01      |
| 3.00e-01        | 0.05              |                                               | 10        | 3.50e-01      |
| 3.50e-01        | 0.05              |                                               | 10        | 4.00e-01      |
| 4.00e-01        | 0.05              |                                               | 10        | 4.50e-01      |
| 4.50e-01        | 0.05              |                                               | 10        | 5.00e-01      |
| 5.00e-01        | 0.05              |                                               | 10        | 5.50e-01      |
| 5.50e-01        | 0.05              |                                               | 10        | 6.00e-01      |
| 6.00e-01        | 0.05              |                                               | 10        | 6.50e-01      |
| 6.50e-01        | 0.05              |                                               | 10        | 7.00e-01      |
| 7.00e-01        | 0.05              |                                               | 10        | 7.50e-01      |
| 7.50e-01        | 0.05              |                                               | 10        | 8.00e-01      |
| 8.00e-01        | 0.05              |                                               | 10        | 8.50e-01      |
| 8.50e-01        | 0.05              |                                               | 10        | 9.00e-01      |
| 9.00e-01        | 0.05              |                                               | 10        | 9.50e-01      |
| 9.50e-01        |                   |                                               | 10        | 9.90e-01      |
| 9.90e-01        |                   |                                               | 10        | 9.95e-01      |
| 9.95e-01        |                   |                                               | 10        | 9.98e-01      |
| 9.98e-01        |                   |                                               | 10        | 9.95e-01      |
| 9.95e-01        |                   |                                               | 10        | 9.90e-01      |
| 9.90e-01        |                   |                                               | 10        | 9.50e-01      |
| 9.50e-01        |                   |                                               | 10        | 9.00e-01      |
| 9.00e-01        |                   |                                               | 10        | 8.50e-01      |
| 8.50e-01        |                   |                                               | 10        | 8.00e-01      |
| 8.00e-01        |                   |                                               | 10        | 7.50e-01      |
| 7.50e-01        |                   |                                               | 10        | 7.00e-01      |
| 7.00e-01        |                   |                                               | 10        | 6.50e-01      |
| 6.50e-01        |                   |                                               | 10        | 6.00e-01      |
| 6.00e-01        |                   |                                               | 10        | 5.50e-01      |
| 5.50e-01        |                   |                                               | 10        | 5.00e-01      |
| 5.00e-01        |                   |                                               | 10        | 4.50e-01      |
| 4.50e-01        |                   |                                               | 10        | 4.00e-01      |
| 4.00e-01        |                   |                                               | 10        | 3.50e-01      |
| 3.50e-01        |                   |                                               | 10        | 3.00e-01      |
| 3.00e-01        |                   |                                               | 10        | 2.50e-01      |
| 2.50e-01        |                   |                                               | 10        | 2.00e-01      |
| 2.00e-01        |                   |                                               | 10        | 1.50e-01      |
| 1.50e-01        |                   |                                               | 10        | 1.00e-01      |



## 6. BETSI analysis

BETSI analysis<sup>S2</sup> was performed with the constraints of having maximum percentage error of 20%, a minimum  $r^2$  of 0.995, and starting with a minimum number of 10 points. In cases where a 10 point range could not be found to satisfy the other requirements, this number was reduced and the calculation repeated until a fit could be achieved - in this study this only applied to VRnzZ-10-700. Results summary is tabulated in table S2.

**Table S2:** Summary of BETSI results for optimum fitting. An  $r^2$  of  $>0.9999$  was consistently rounded down as opposed to rounding up to 1.0000 as to not give the false impression of a perfect fit.

| Sample               | $A_{BET}/m^2 g^{-1}$ | points | $r^2$  | Slope    | intercept              | C     | $Q_m / cm^3 g^{-1} stp$ |
|----------------------|----------------------|--------|--------|----------|------------------------|-------|-------------------------|
| VRd                  | 939                  | 11     | 0.9996 | 0.004635 | $2.144 \times 10^{-7}$ | 21620 | 215.7                   |
| VRnzK-700 (hard)     | 1503                 | 12     | 0.9999 | 0.002892 | $3.789 \times 10^{-6}$ | 764.2 | 345.3                   |
| VRnzK-700 (flexible) | 1010                 | 29     | 0.9999 | 0.004302 | $7.652 \times 10^{-6}$ | 563.1 | 232.1                   |
| VRnzZ-10-630         | 947                  | 11     | 0.9999 | 0.004596 | $2.641 \times 10^{-6}$ | 1741  | 217.4                   |
| VRnzZ-50-630         | 1222                 | 11     | 0.9999 | 0.003561 | $1.248 \times 10^{-6}$ | 2856  | 280.7                   |
| VRnzZ-100-630        | 926                  | 21     | 0.9998 | 0.004700 | $6.125 \times 10^{-8}$ | 76740 | 212.8                   |
| VRnzZ-10-700         | 598                  | 7      | 0.9999 | 0.007284 | $1.573 \times 10^{-7}$ | 46290 | 137.3                   |
| VRnzZ-50-700         | 965                  | 11     | 0.9999 | 0.004509 | $1.025 \times 10^{-6}$ | 4399  | 221.7                   |
| VRnP-750             | 1934                 | 11     | 0.9999 | 0.002250 | $1.346 \times 10^{-6}$ | 1673  | 444.2                   |
| VRnP-800             | 993                  | 11     | 0.9999 | 0.004381 | $1.039 \times 10^{-6}$ | 4220  | 228.2                   |
| VRnP-900             | 1095                 | 11     | 0.9999 | 0.003971 | $1.546 \times 10^{-6}$ | 2570  | 251.7                   |
| VRc                  | 85                   | 11     | 0.9996 | 0.05139  | $4.637 \times 10^{-5}$ | 1109  | 19.44                   |
| VRcP-650             | 942                  | 11     | 0.9996 | 0.004619 | $2.584 \times 10^{-7}$ | 17870 | 216.5                   |
| VRcP-700             | 1013                 | 11     | 0.9996 | 0.004298 | $3.553 \times 10^{-7}$ | 12100 | 232.6                   |
| VRcP-750             | 2227                 | 11     | 0.9996 | 0.001953 | $1.740 \times 10^{-6}$ | 1123  | 511                     |
| VRcP-800             | 713                  | 11     | 0.9999 | 0.006107 | $2.005 \times 10^{-6}$ | 3048  | 163.7                   |
| VRcP-900             | 701                  | 11     | 0.9999 | 0.006209 | $1.478 \times 10^{-6}$ | 4202  | 701.1                   |

### BETSI Analysis for VRc

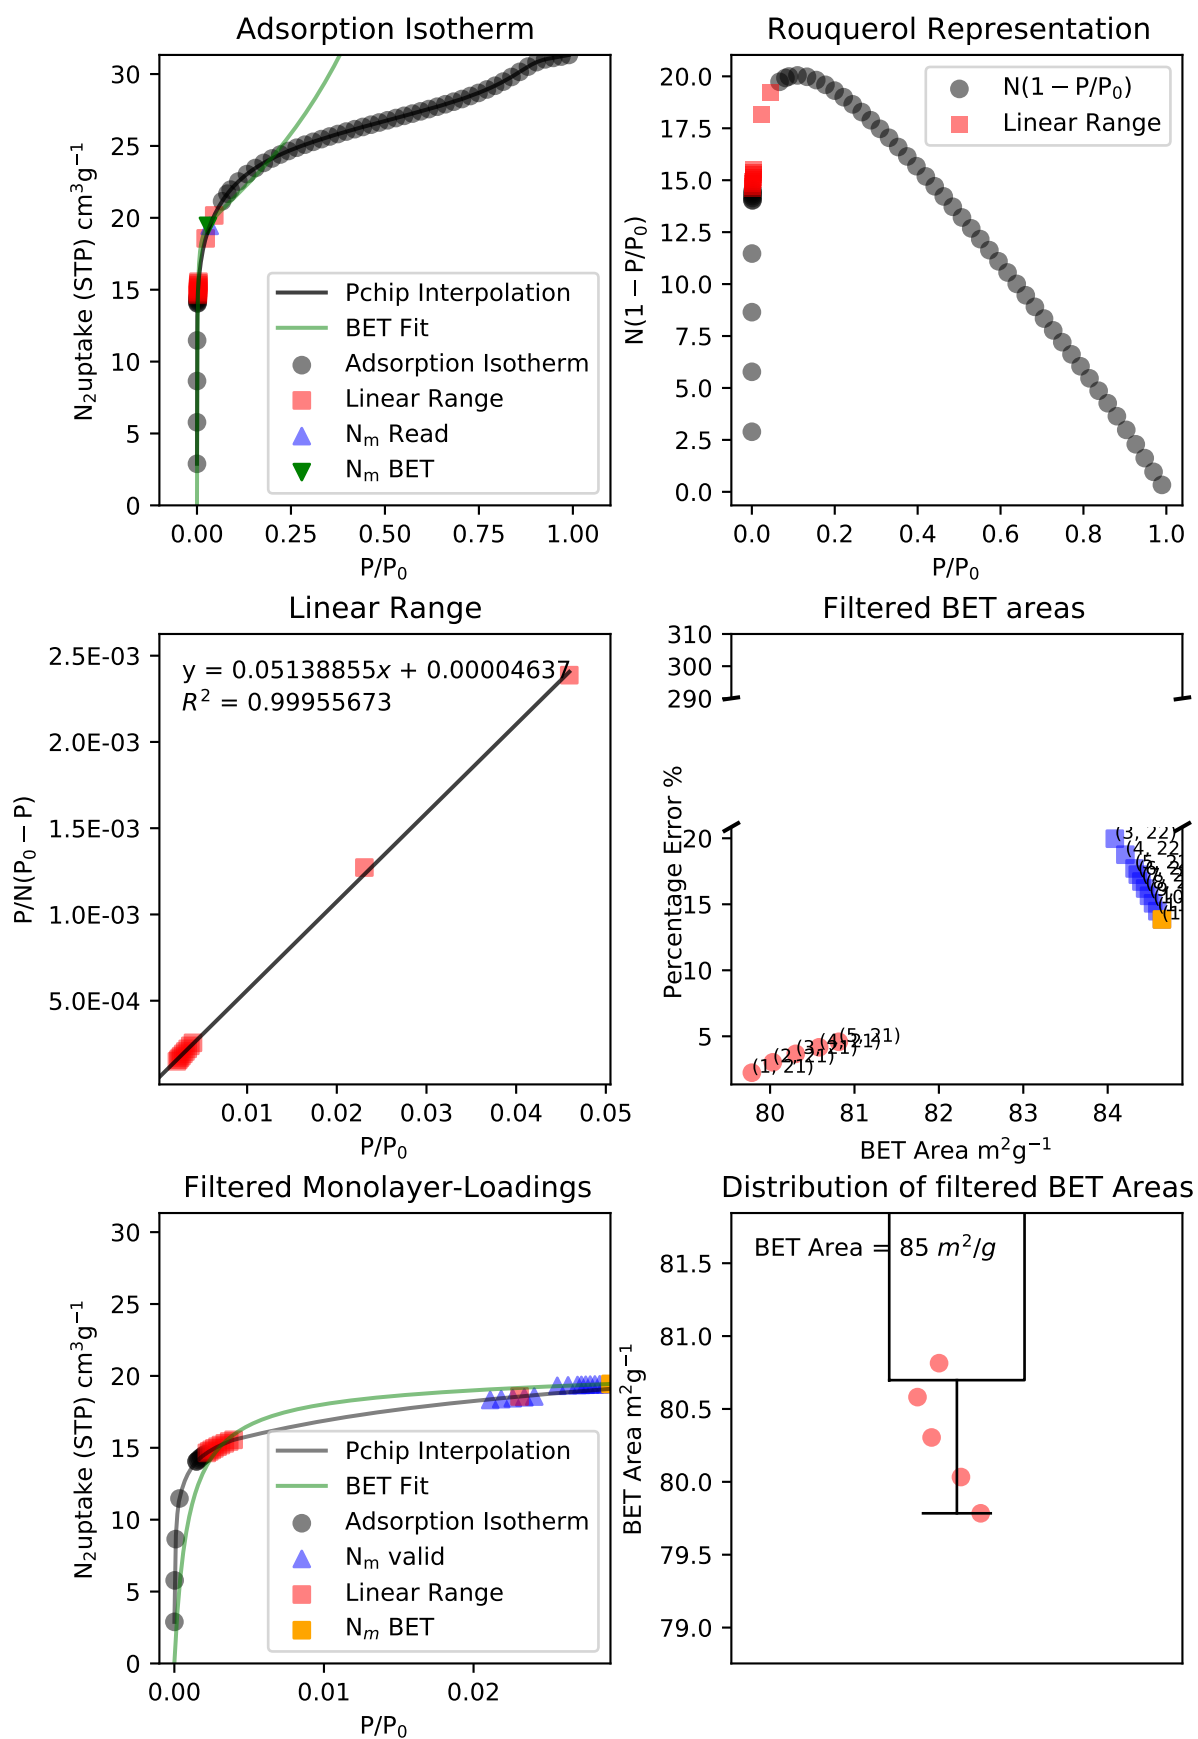

Fig. S11: BETSI analysis for VRc.

### BETSI Analysis for VRcP-650

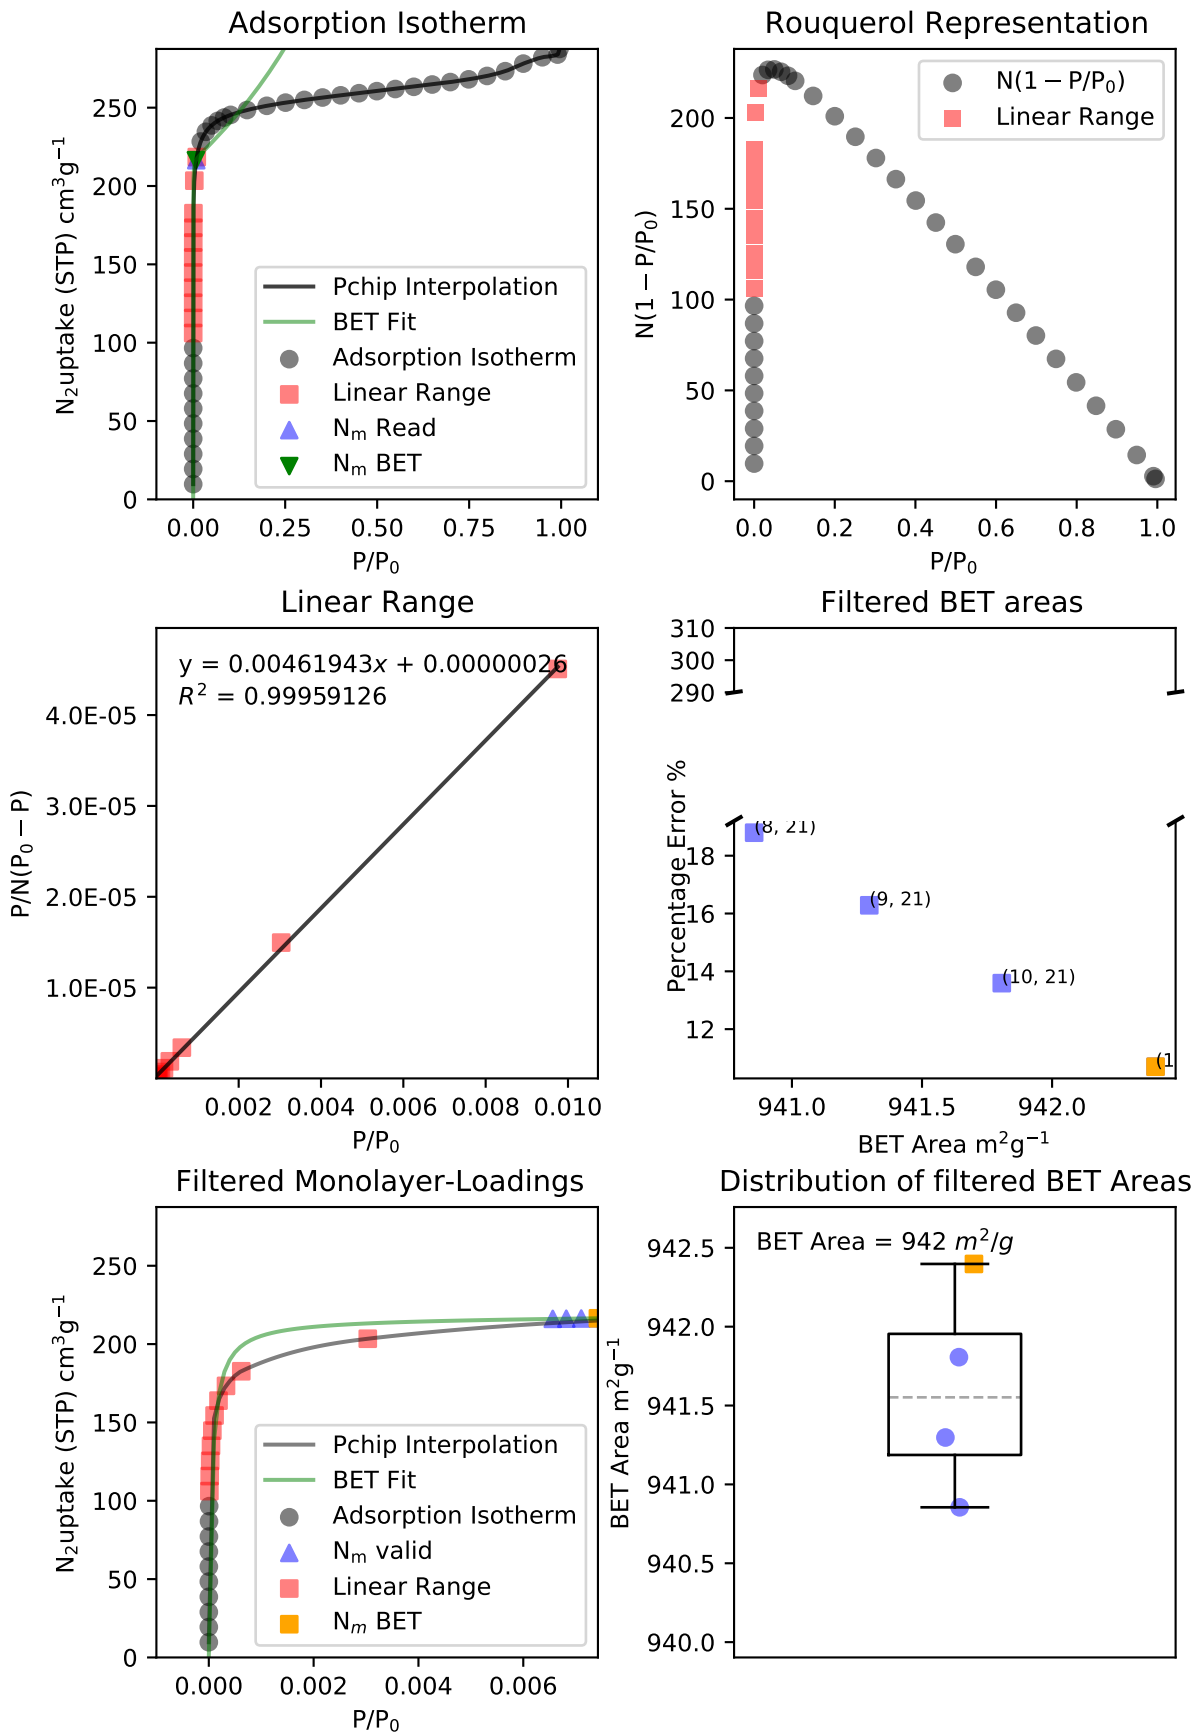

Fig. S12: BETSI analysis for VRcP-650.

### BETSI Analysis for VRcP-700

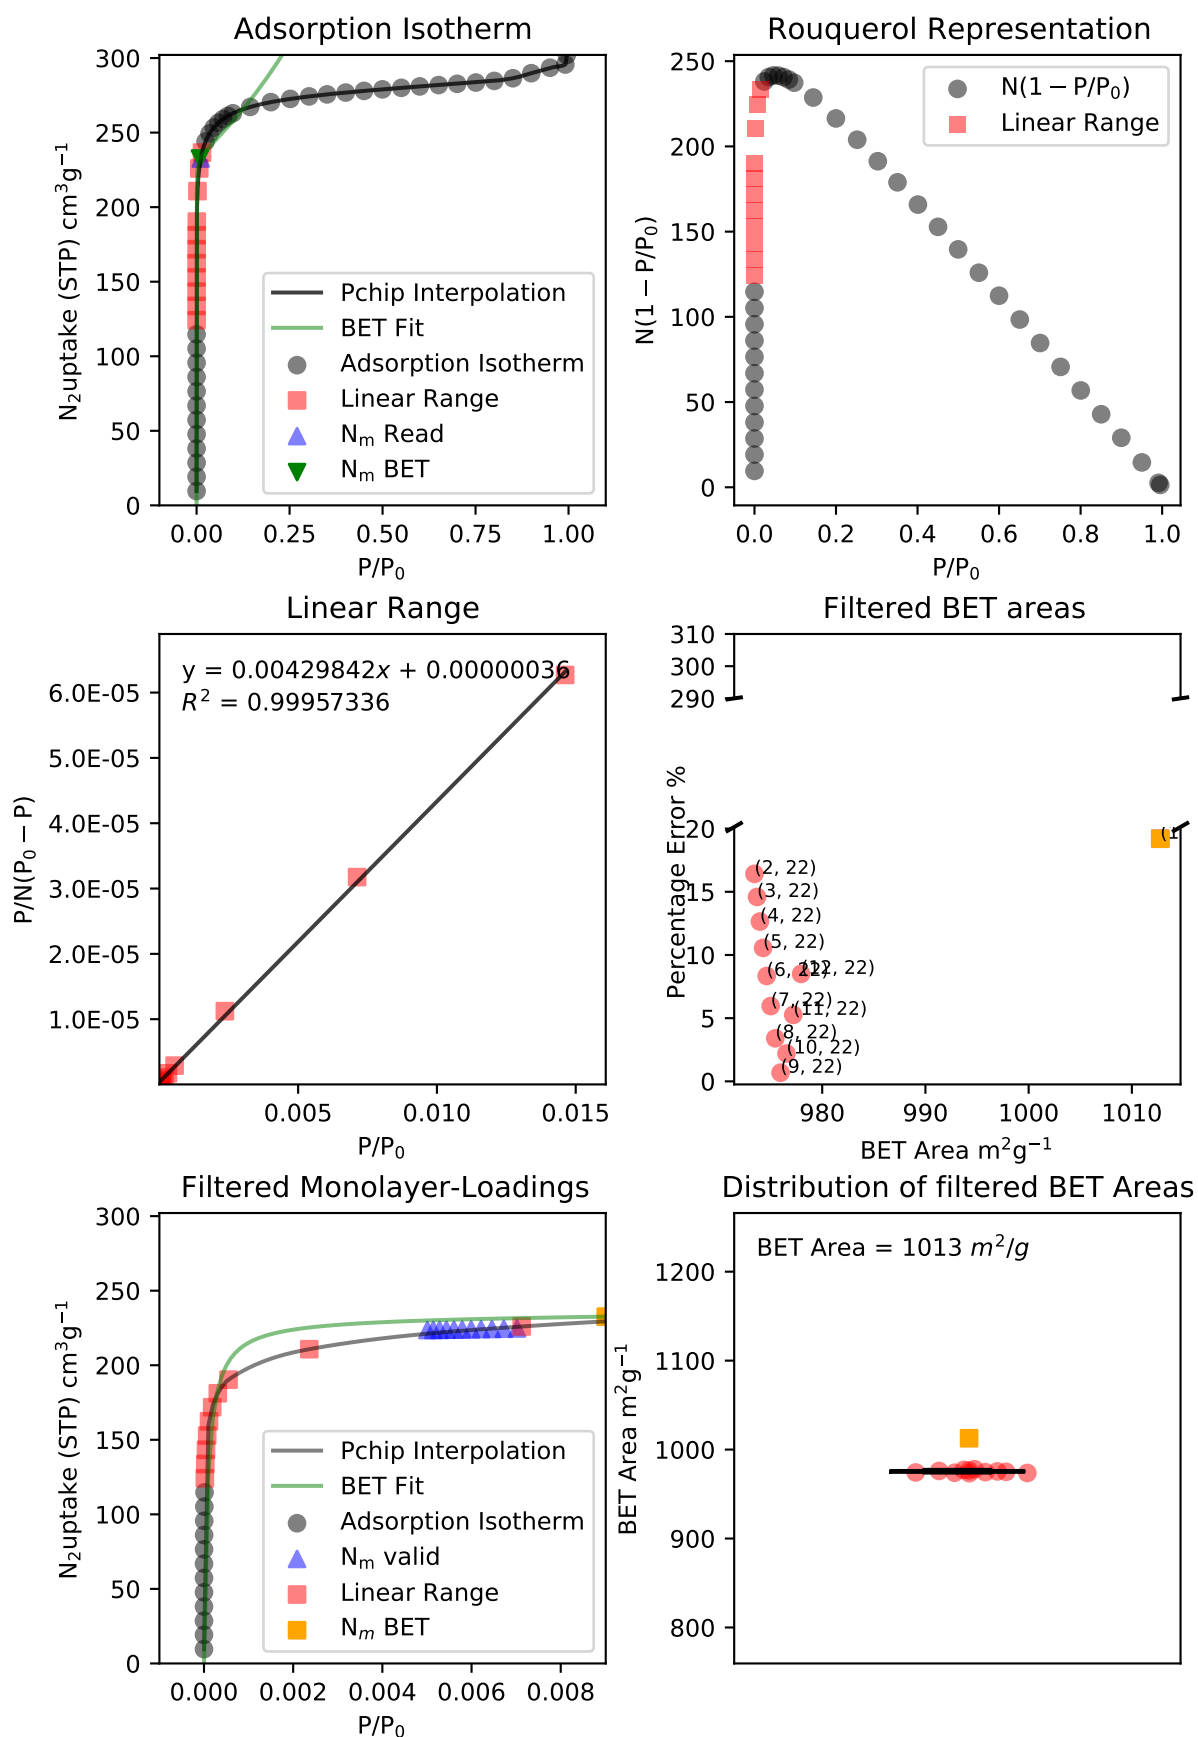

Fig. S13: BETSI analysis for VRcP-700.

### BETSI Analysis for VRcP-750

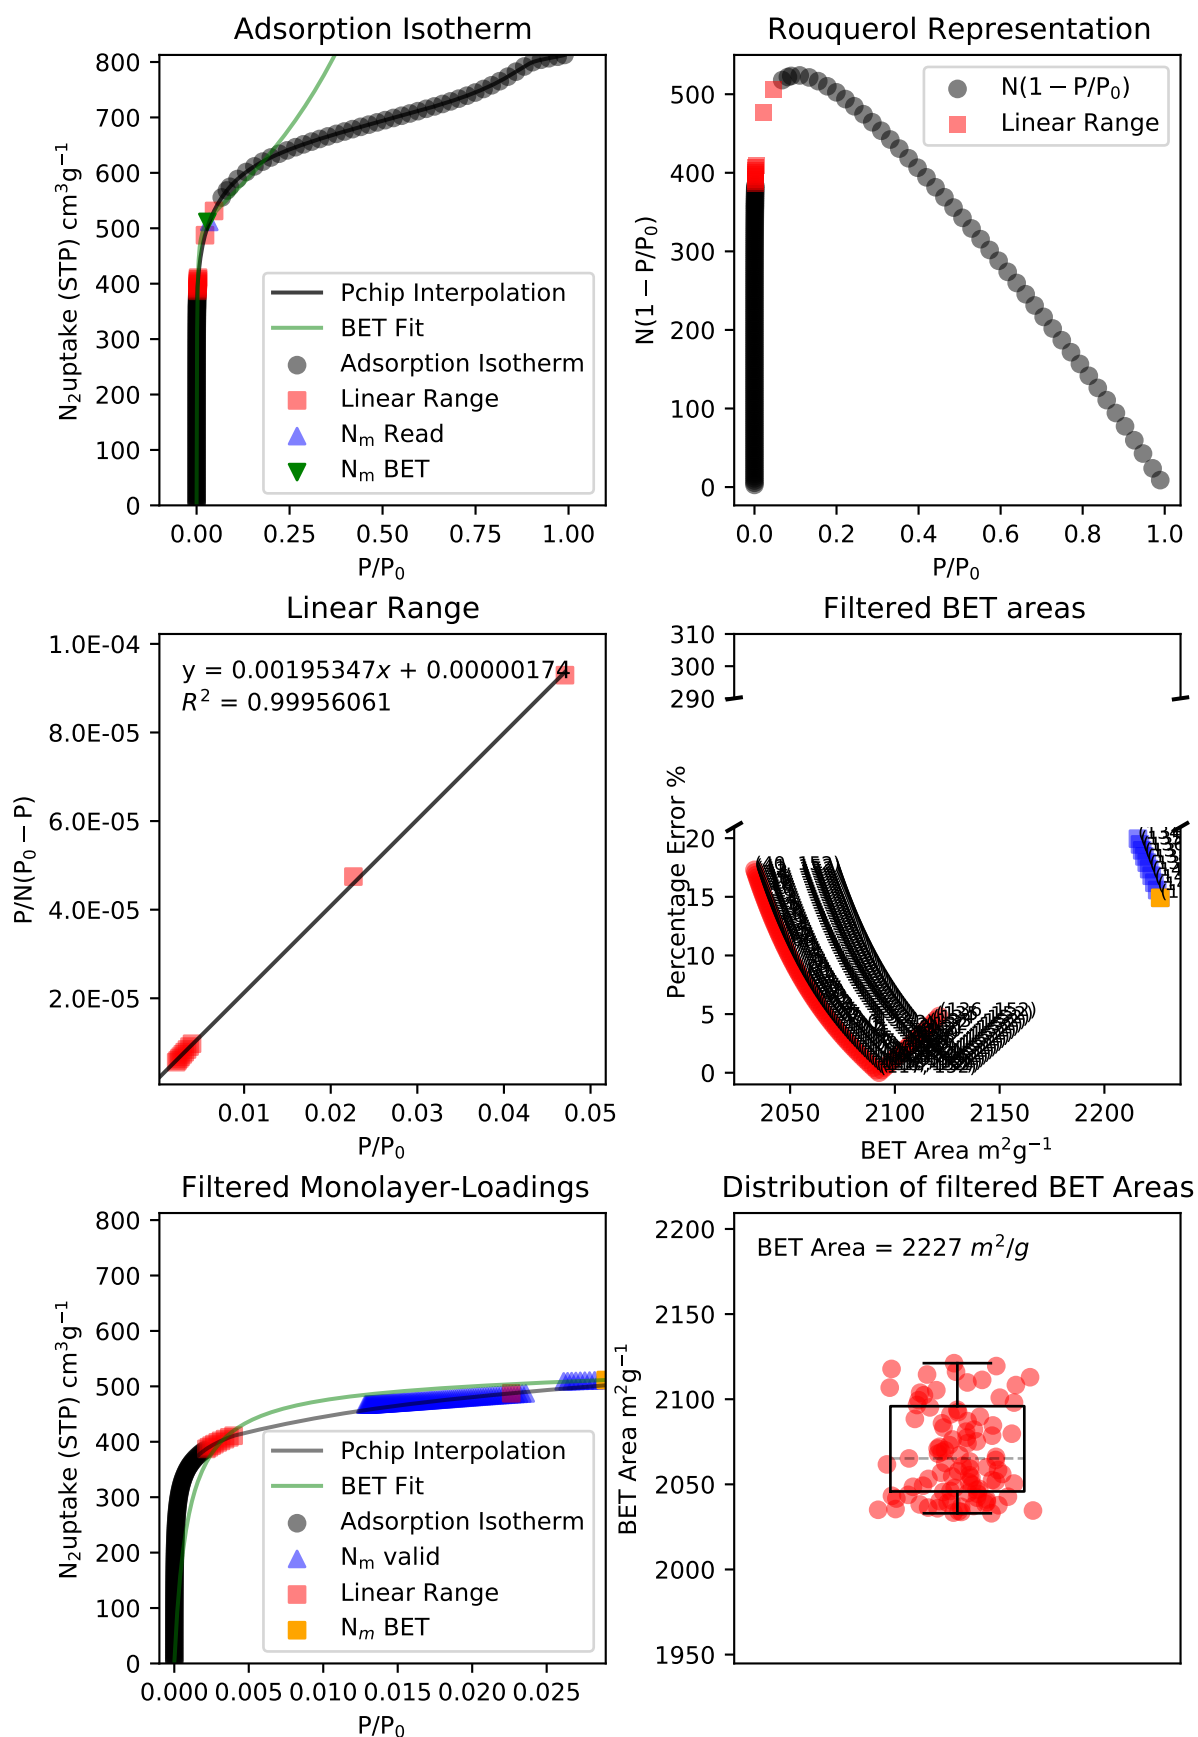

Fig. S14: BETSI analysis for VRcP-750.

### BETSI Analysis for VRcP-800

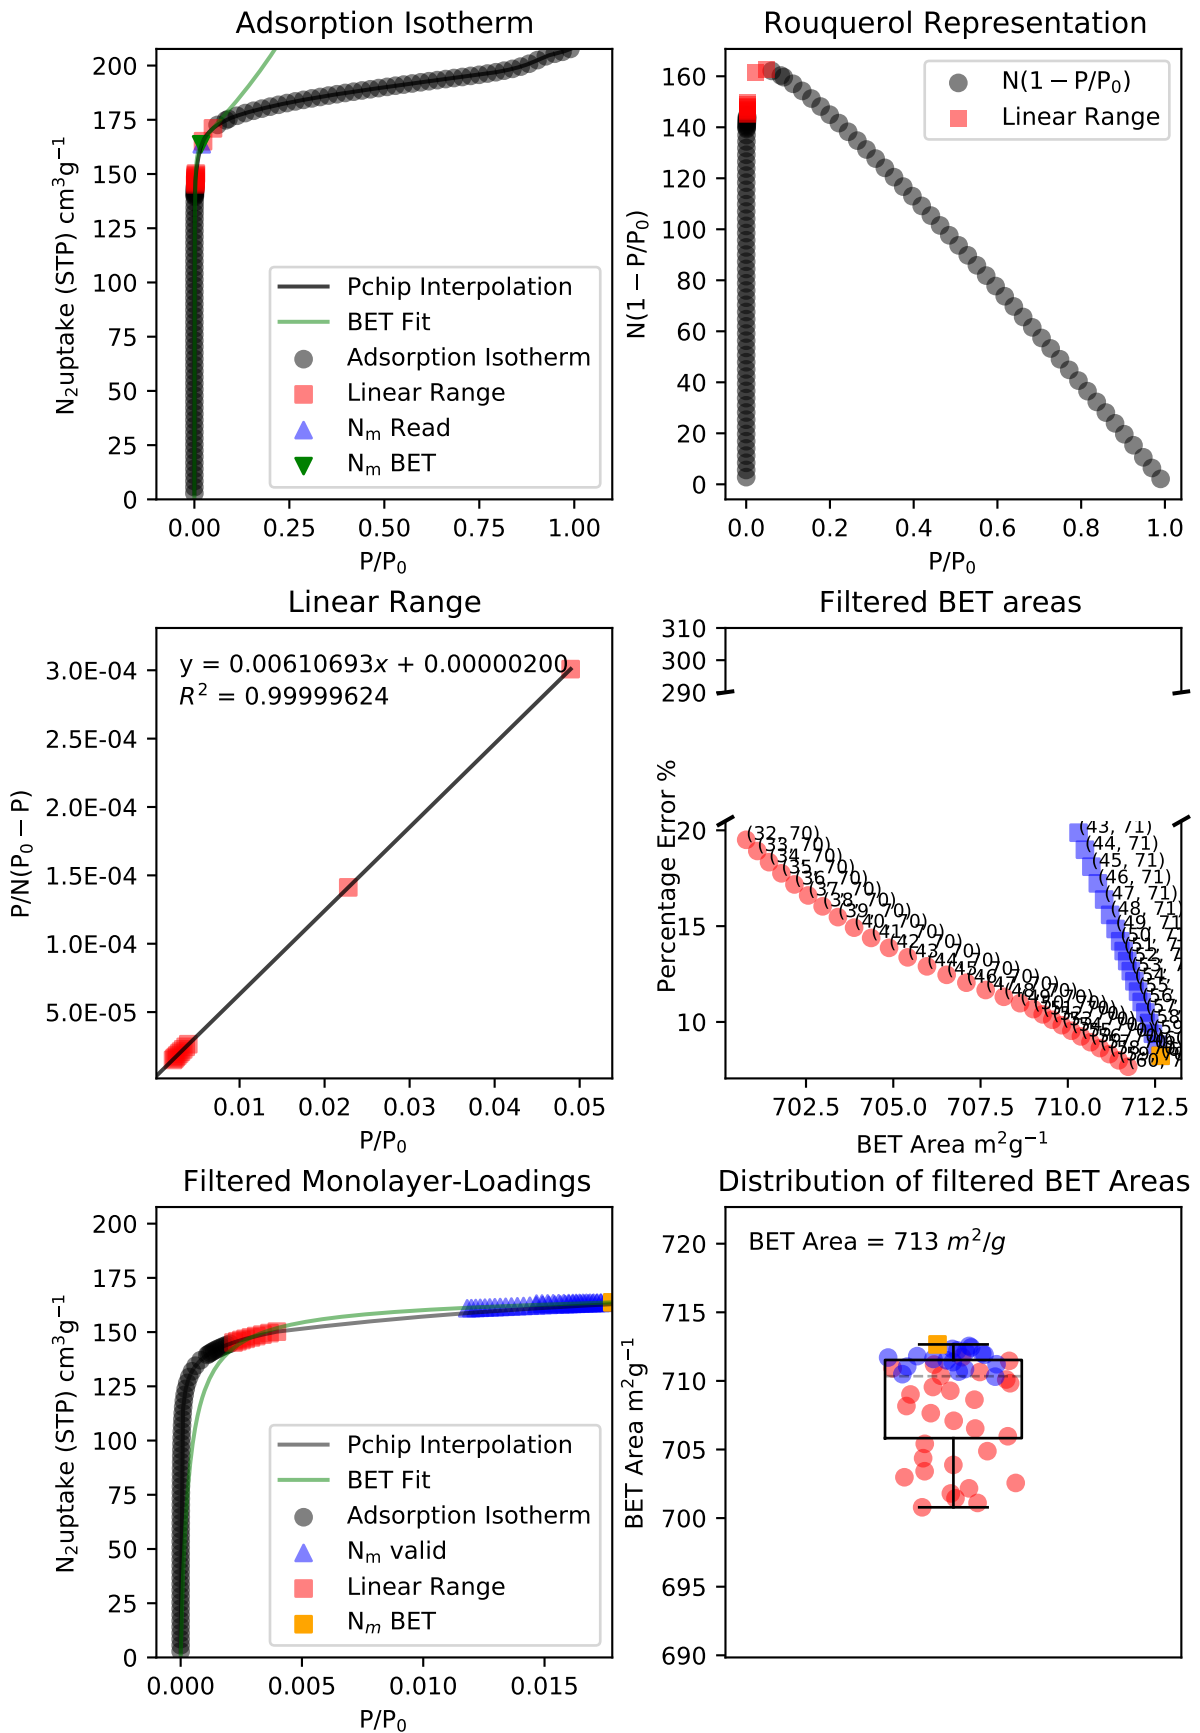

Fig. S15: BETSI analysis for VRcP-800.

### BETSI Analysis for VRcP-900

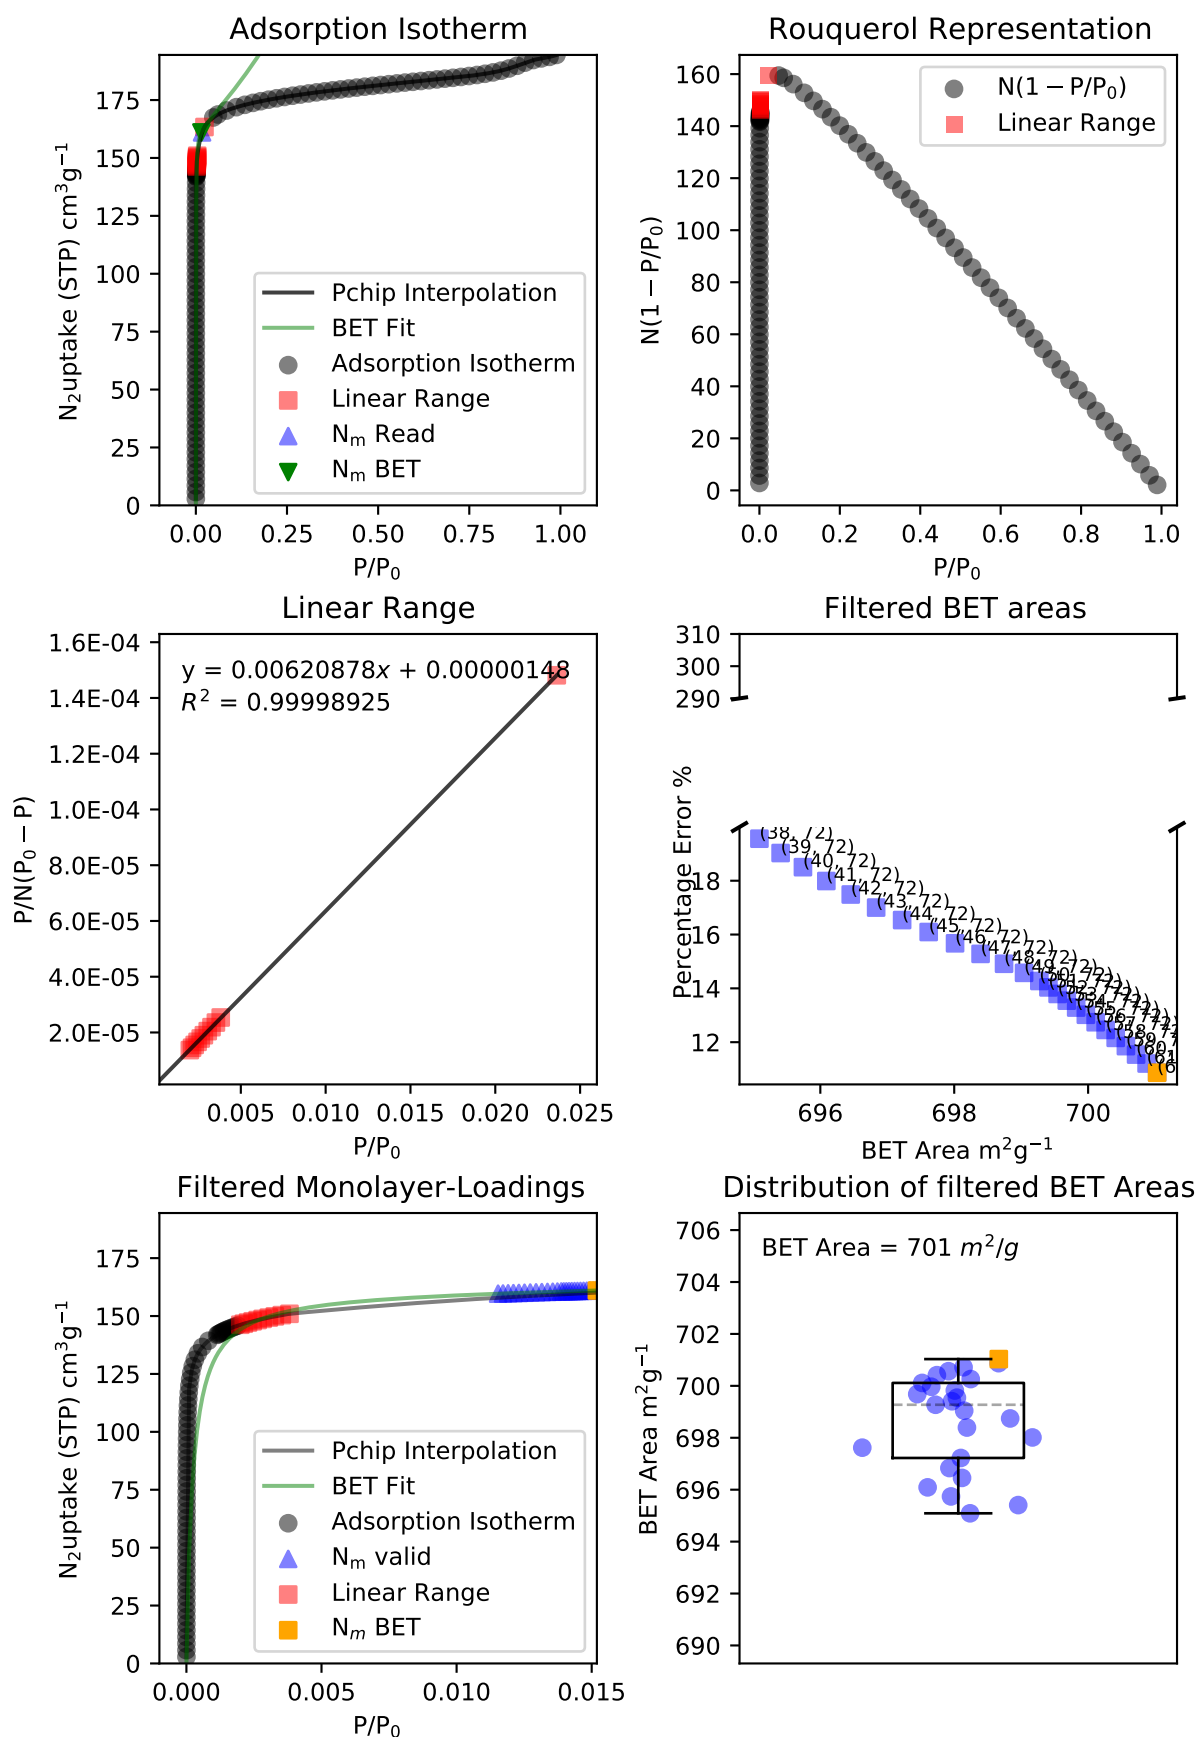

Fig. S16: BETSI analysis for VRcP-900.



## BETSI Analysis for VRd

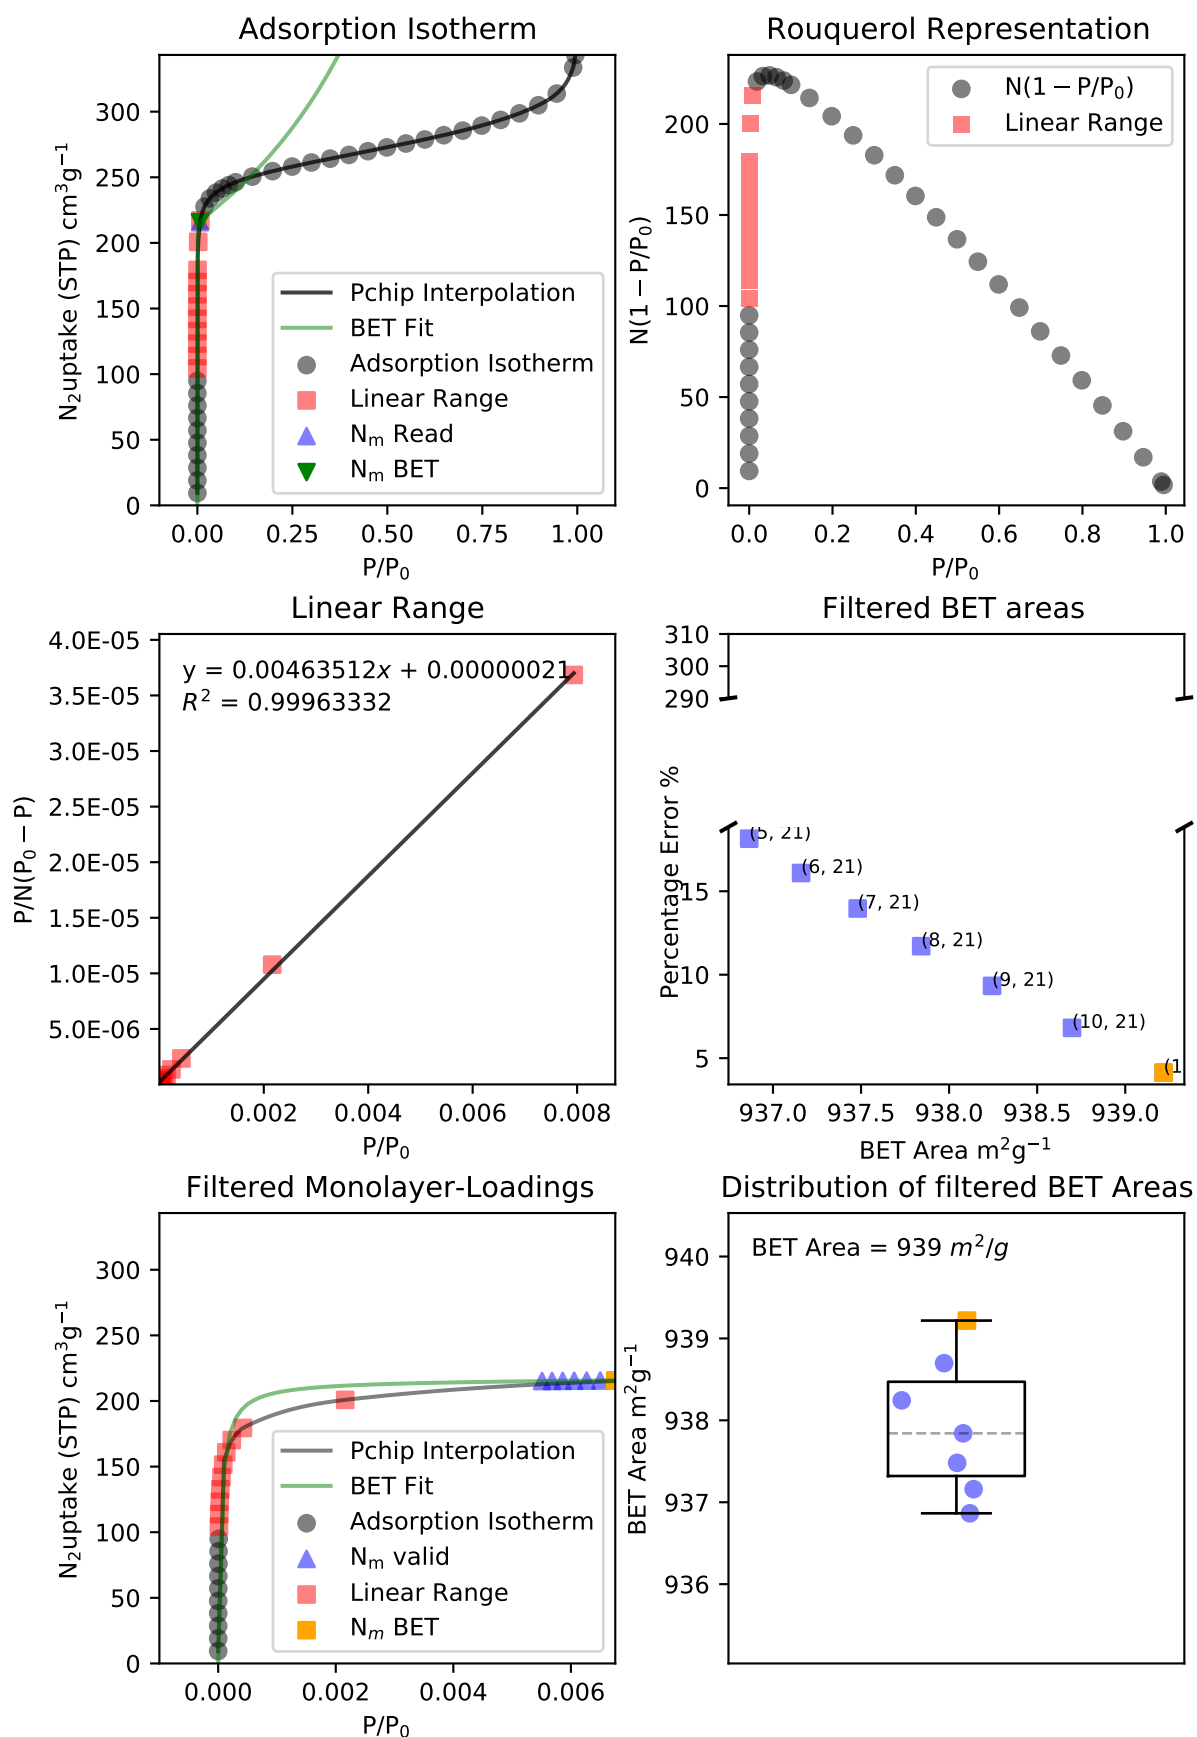

Fig. S17: BETSI analysis for VRd.



### BETSI Analysis for VRnP-800

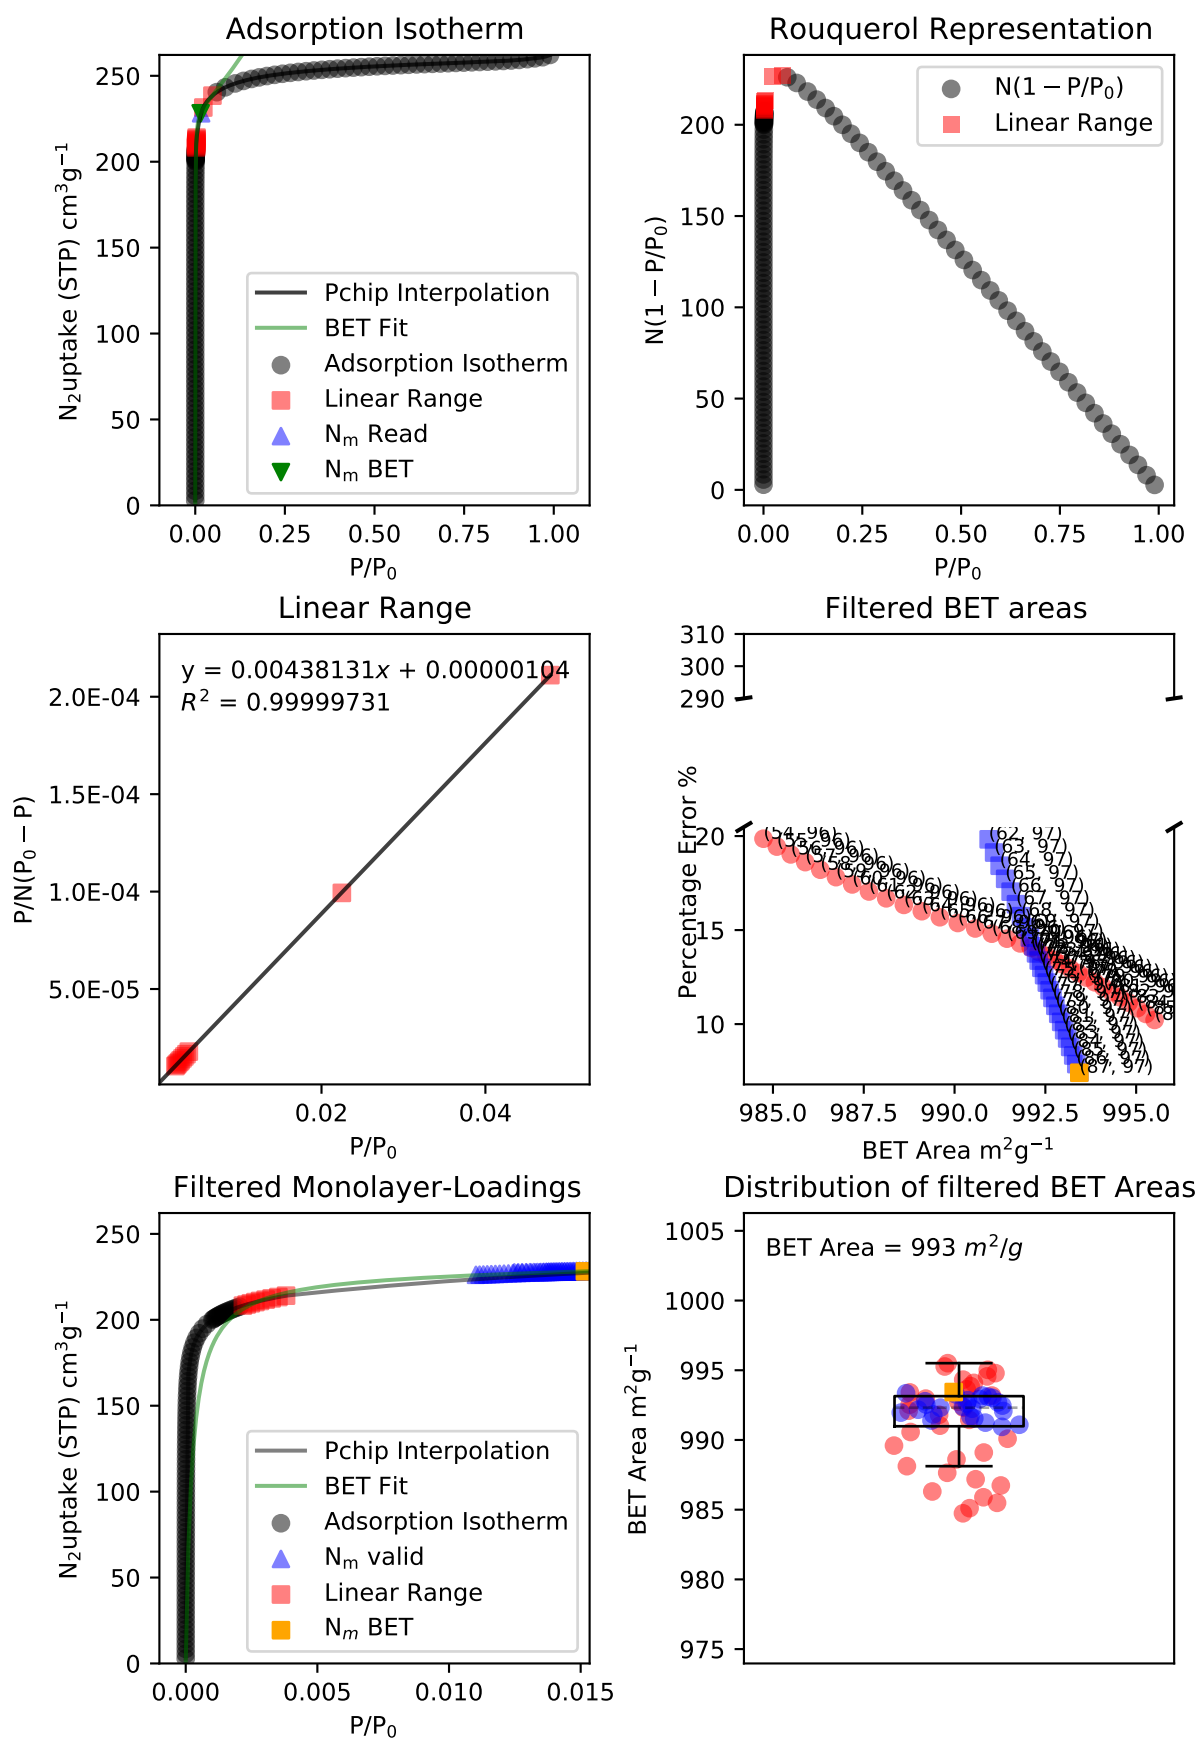

Fig. S19: BETSI analysis for VRnP-800.

### BETSI Analysis for VRnP-900

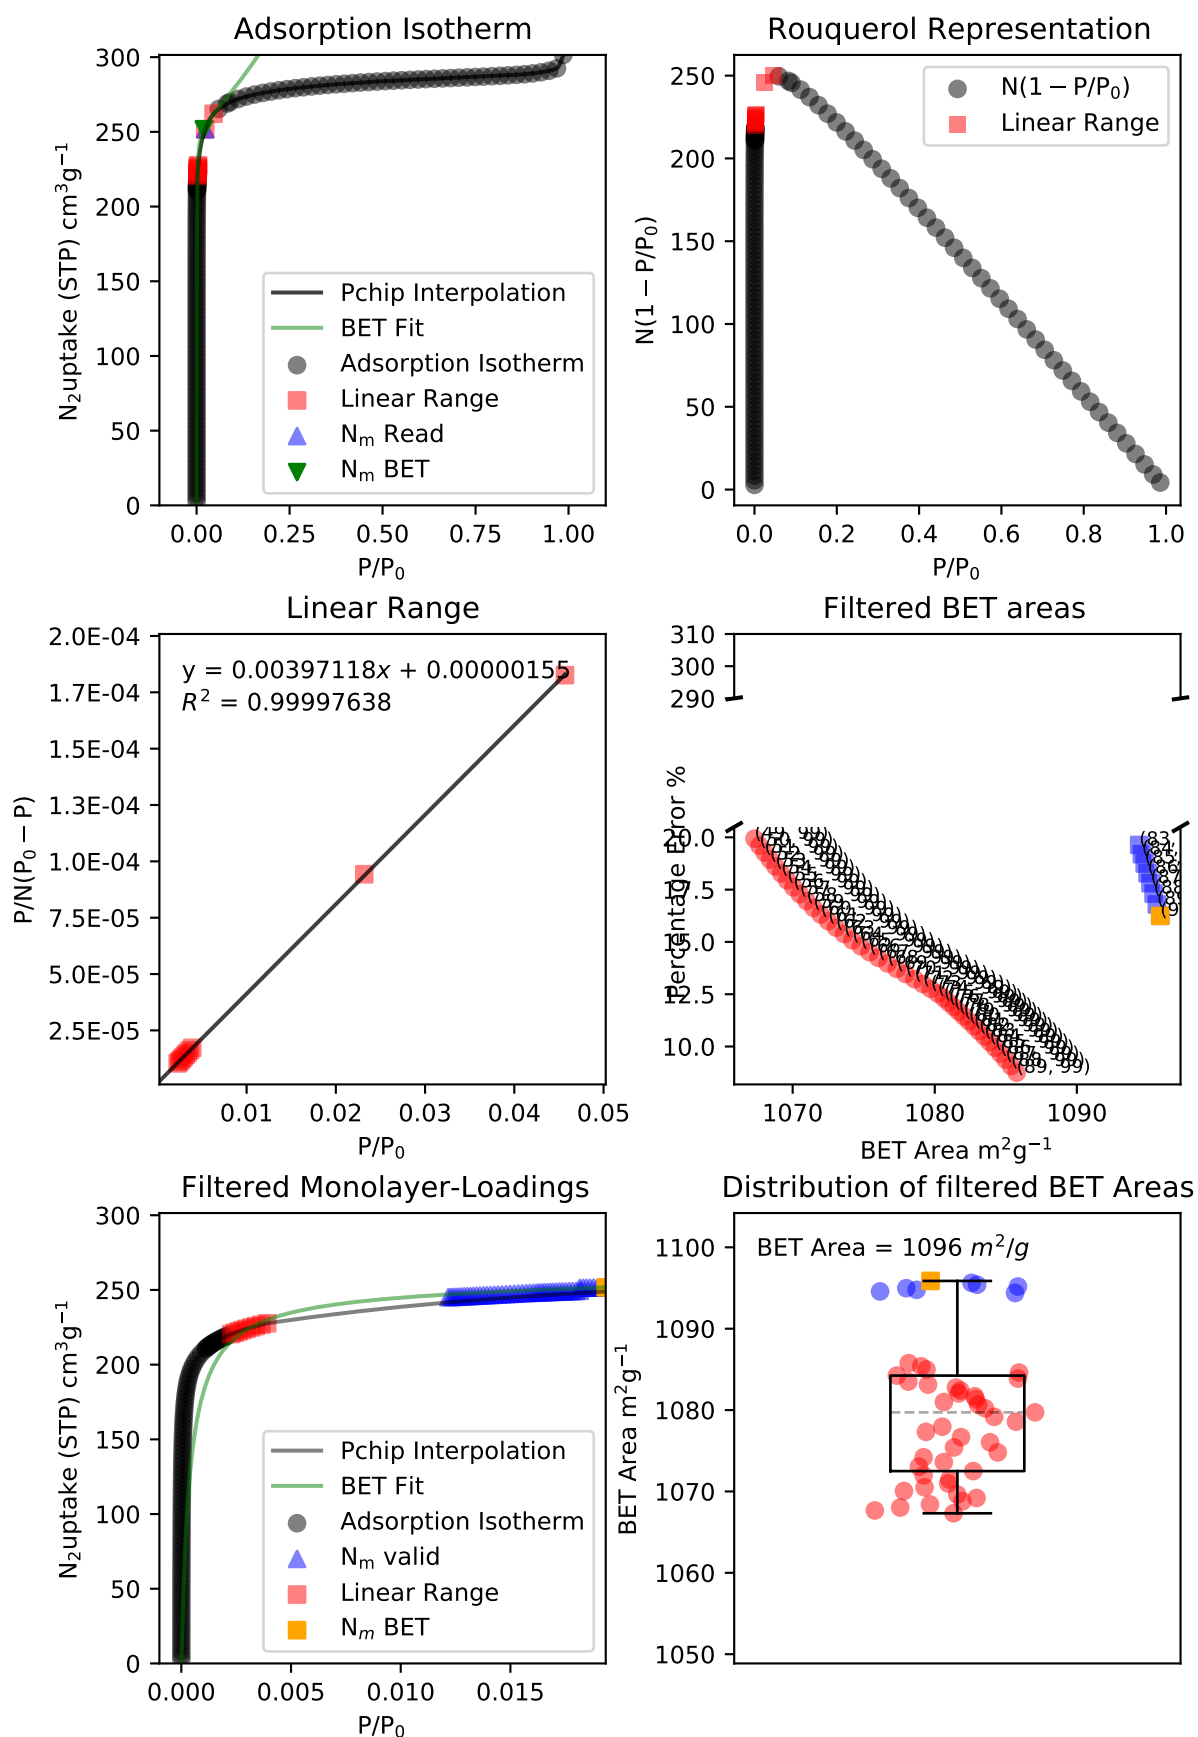

Fig. S20: BETSI analysis for VRnP-900.

### BETSI Analysis for VRnzK (Flexible)

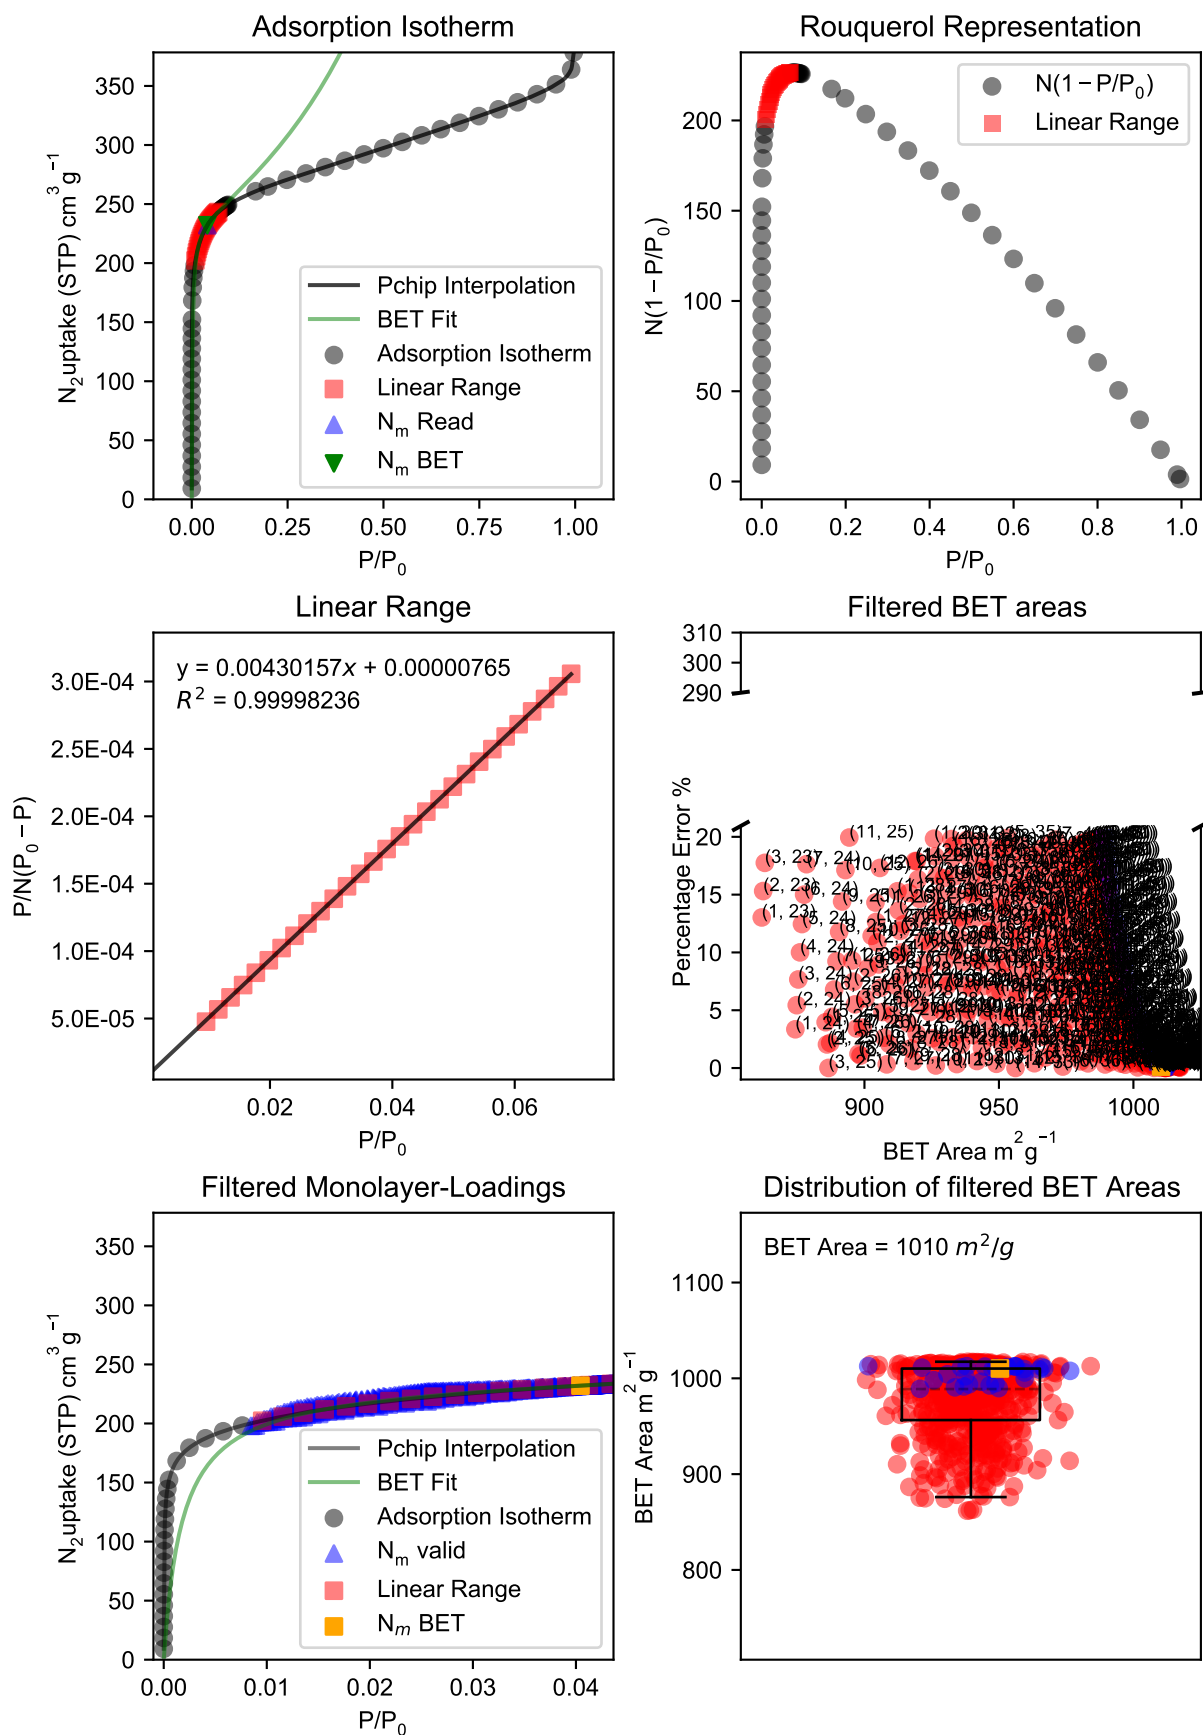

Fig. S21: BETSI analysis for VRnzK (flexible).

### BETSI Analysis for VRnzK (Hard)

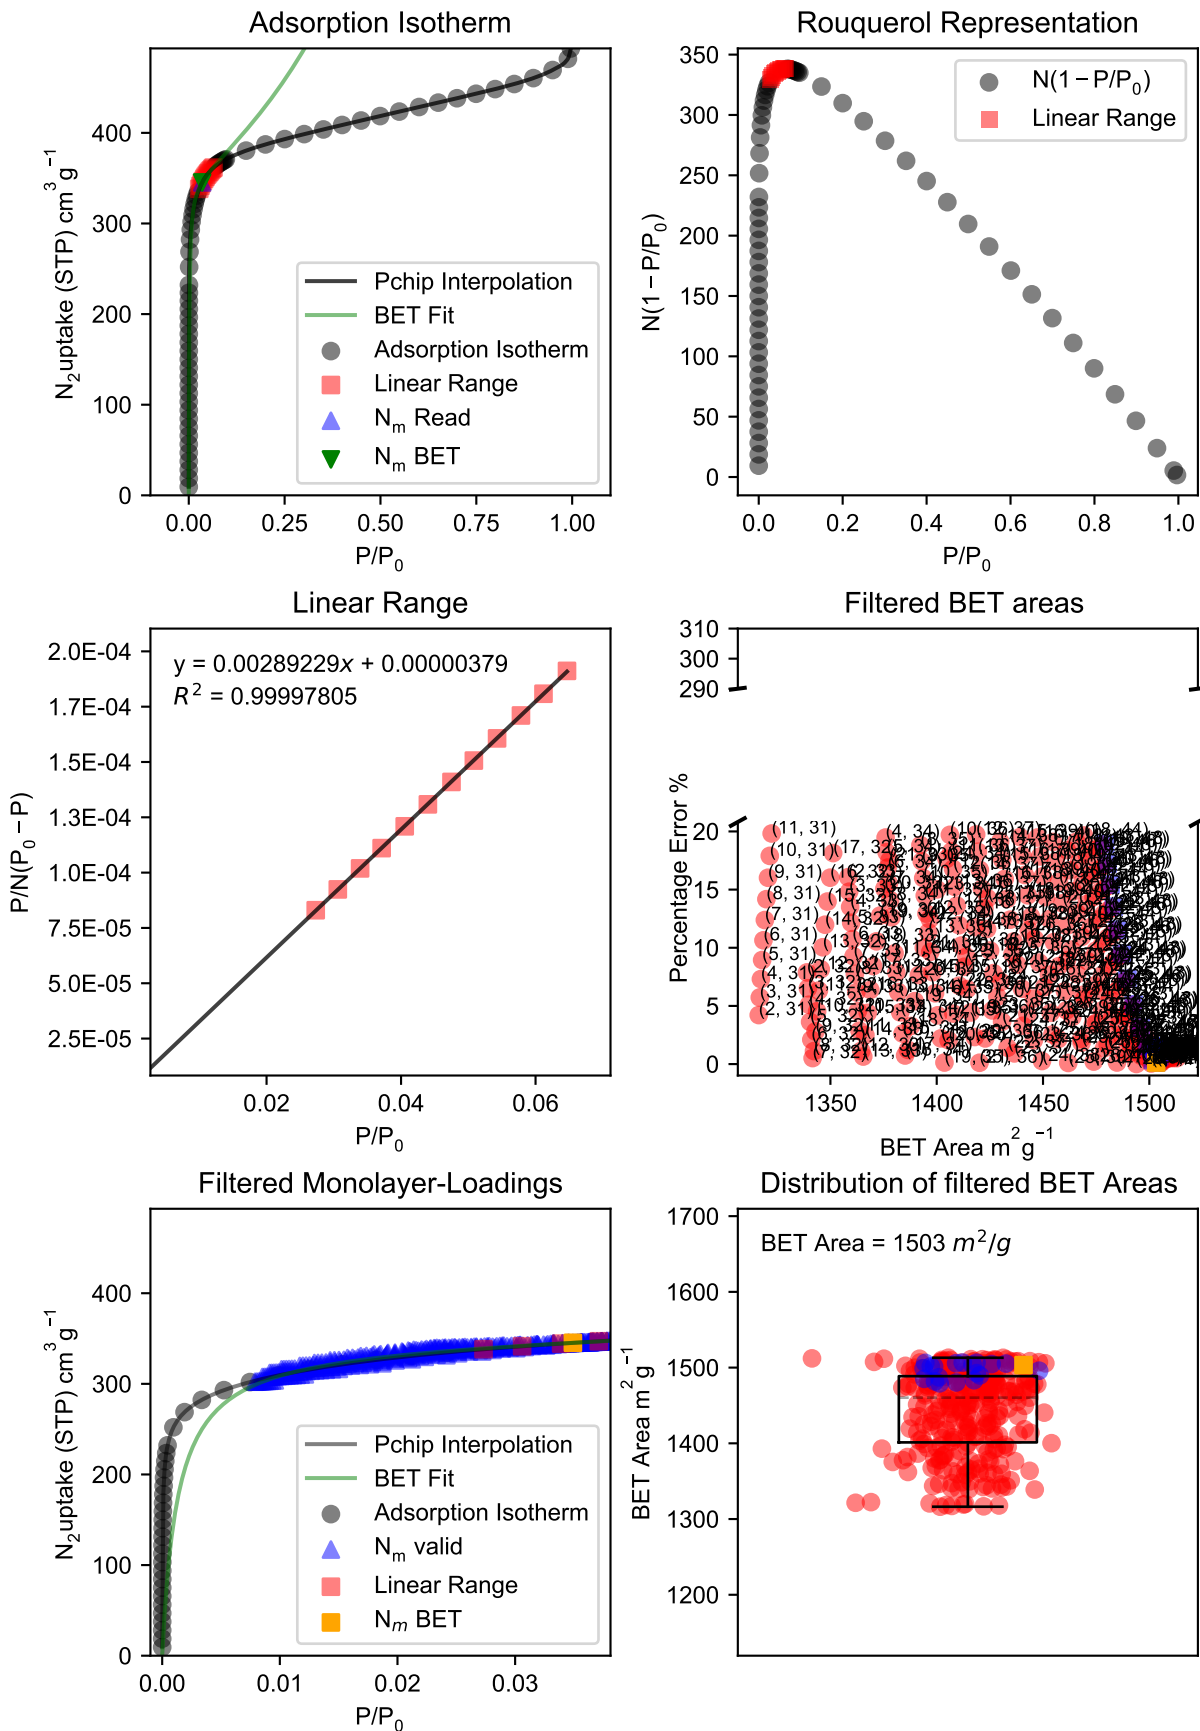

Fig. S22: BETSI analysis for VRnzK (hard).

### BETSI Analysis for VRnzZ-10-630

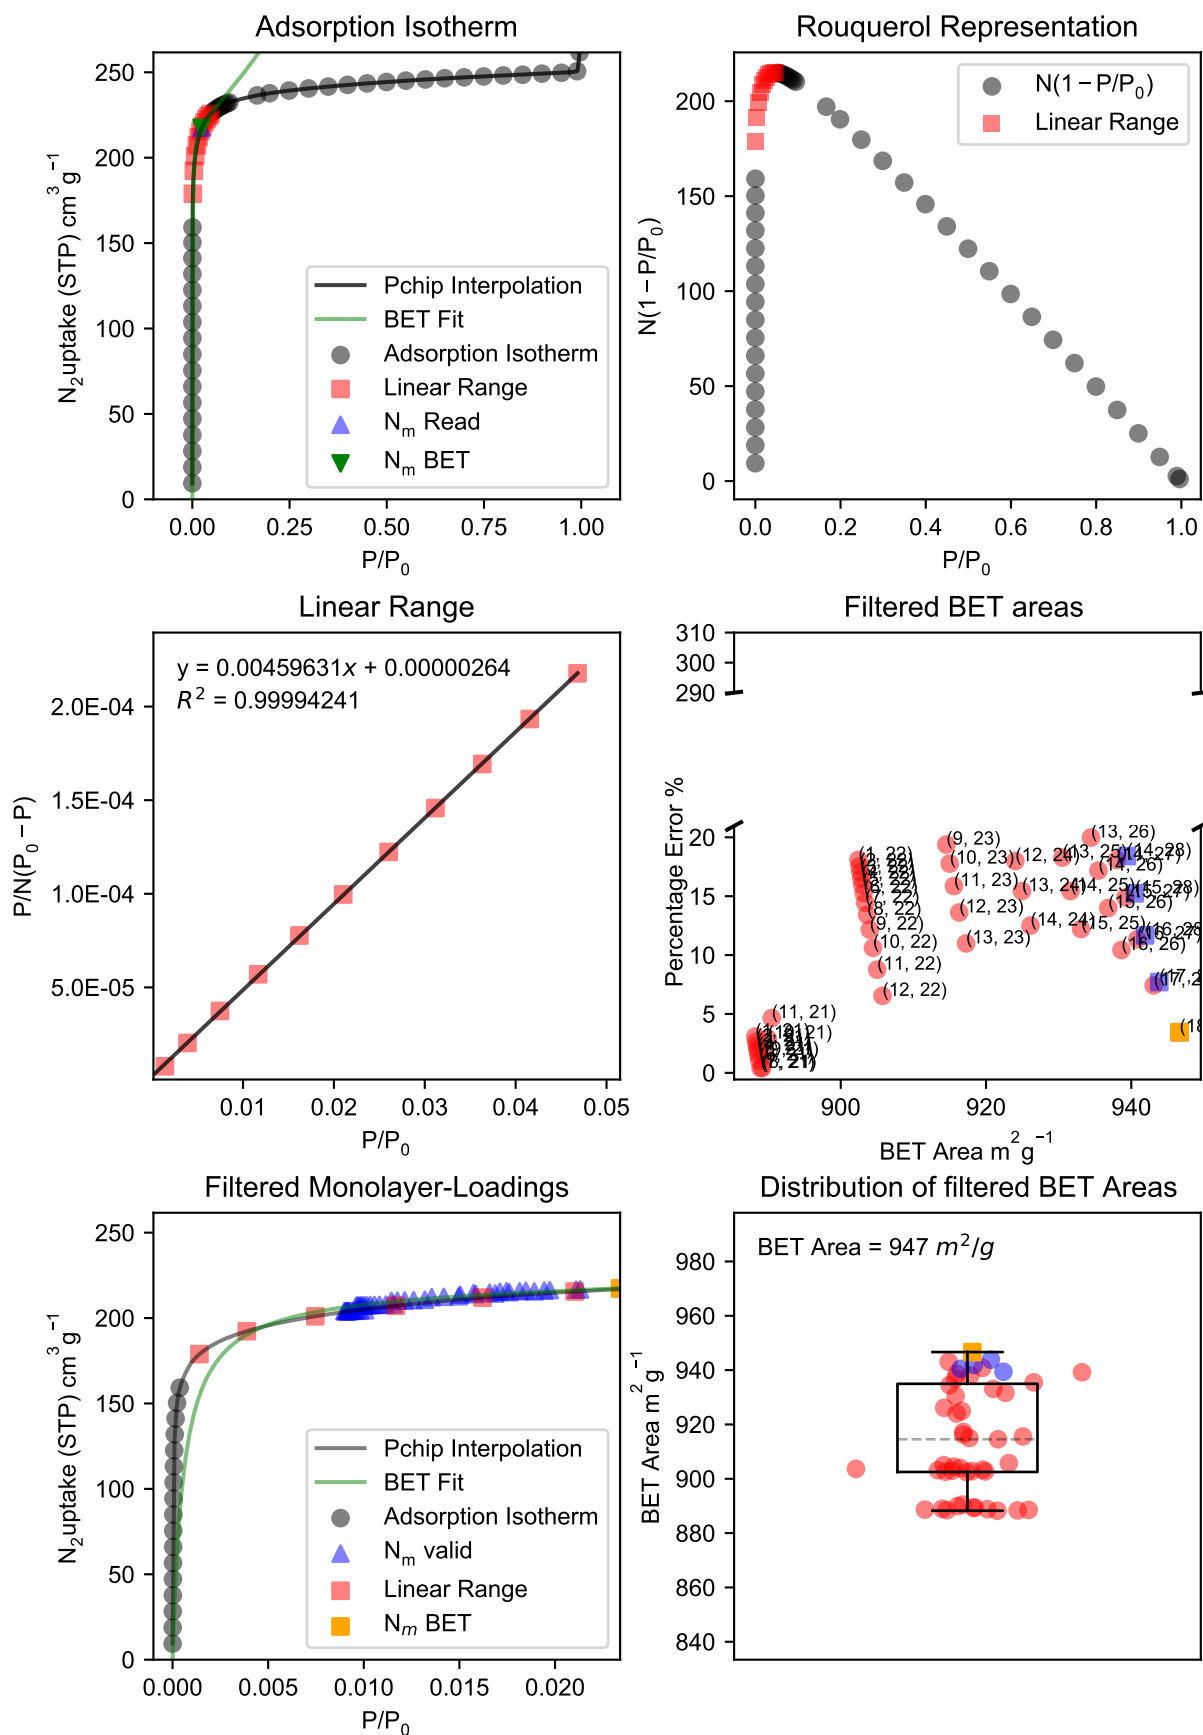

Fig. S23: BETSI analysis for VRnzZ-10-630.



### BETSI Analysis for VRnzZ-10-700

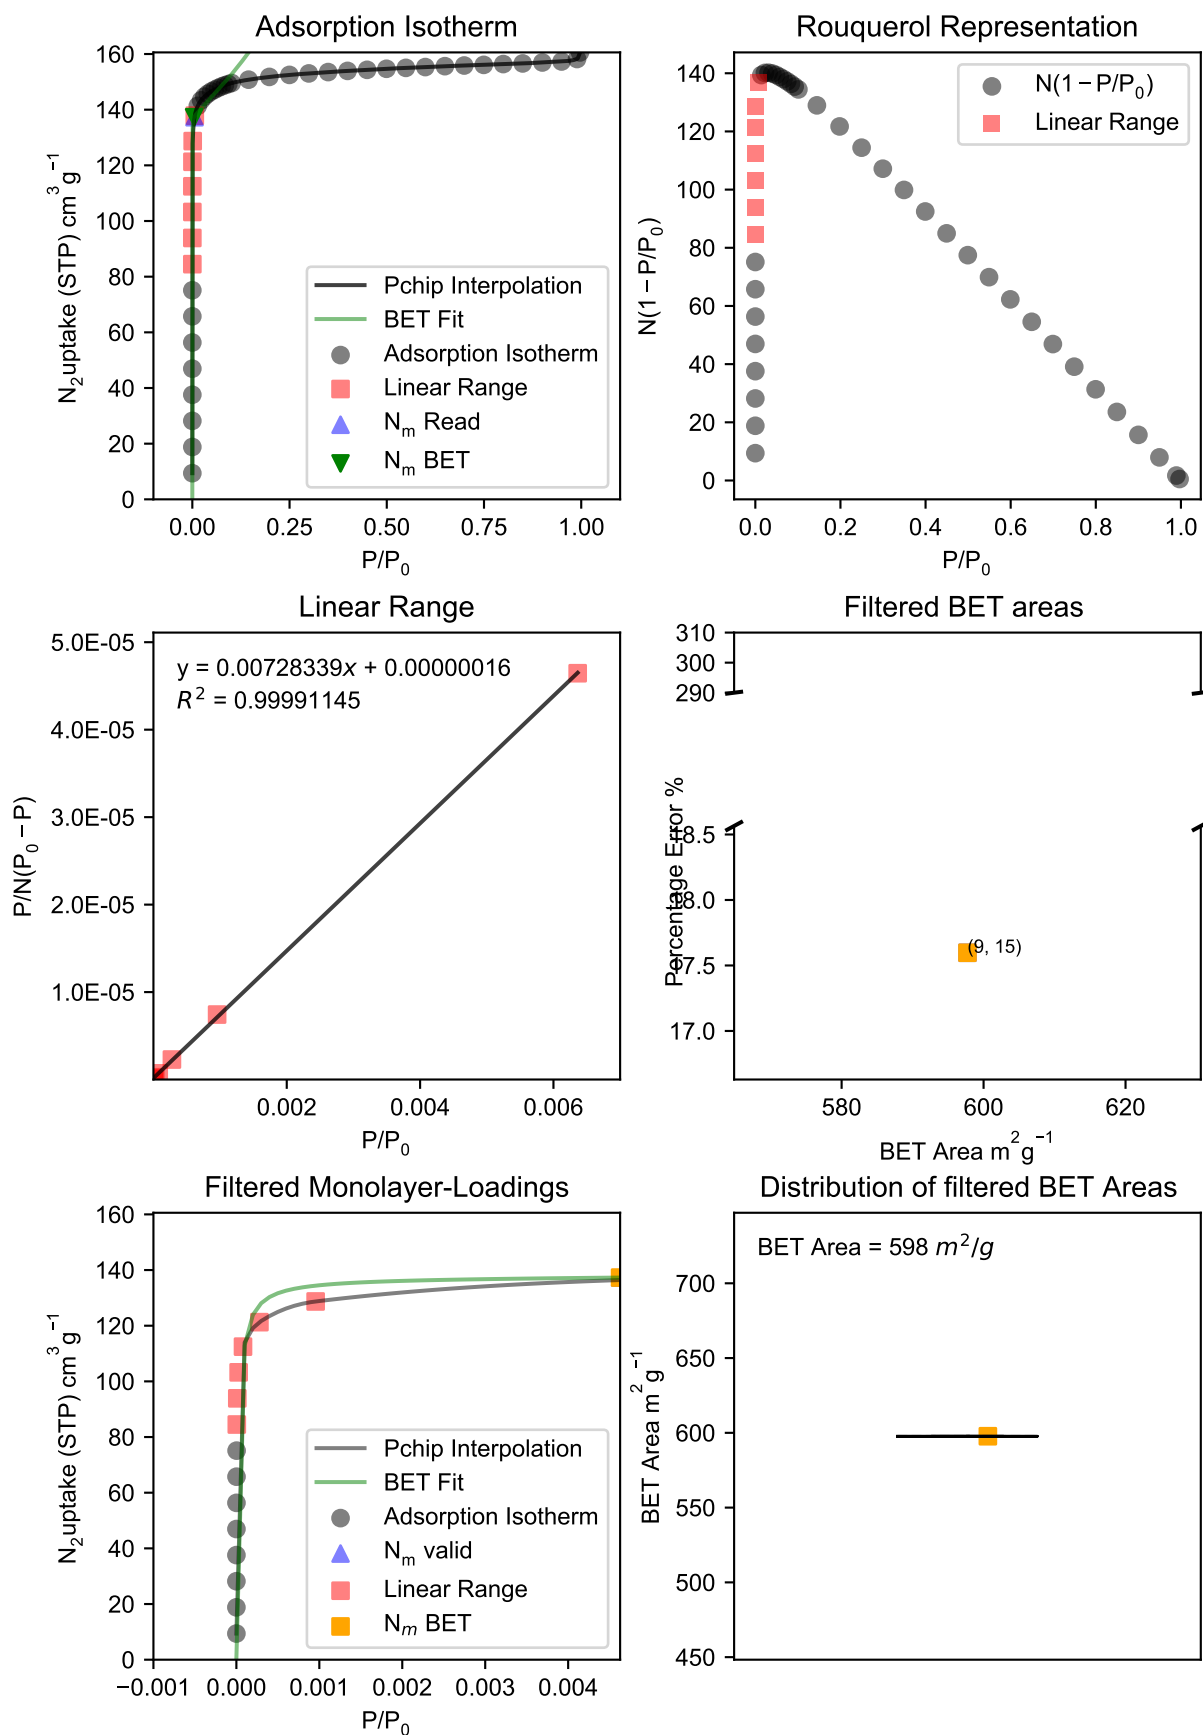

Fig. S24: BETSI analysis for VRnzZ-10-700.

### BETSI Analysis for VRnzZ-100-630

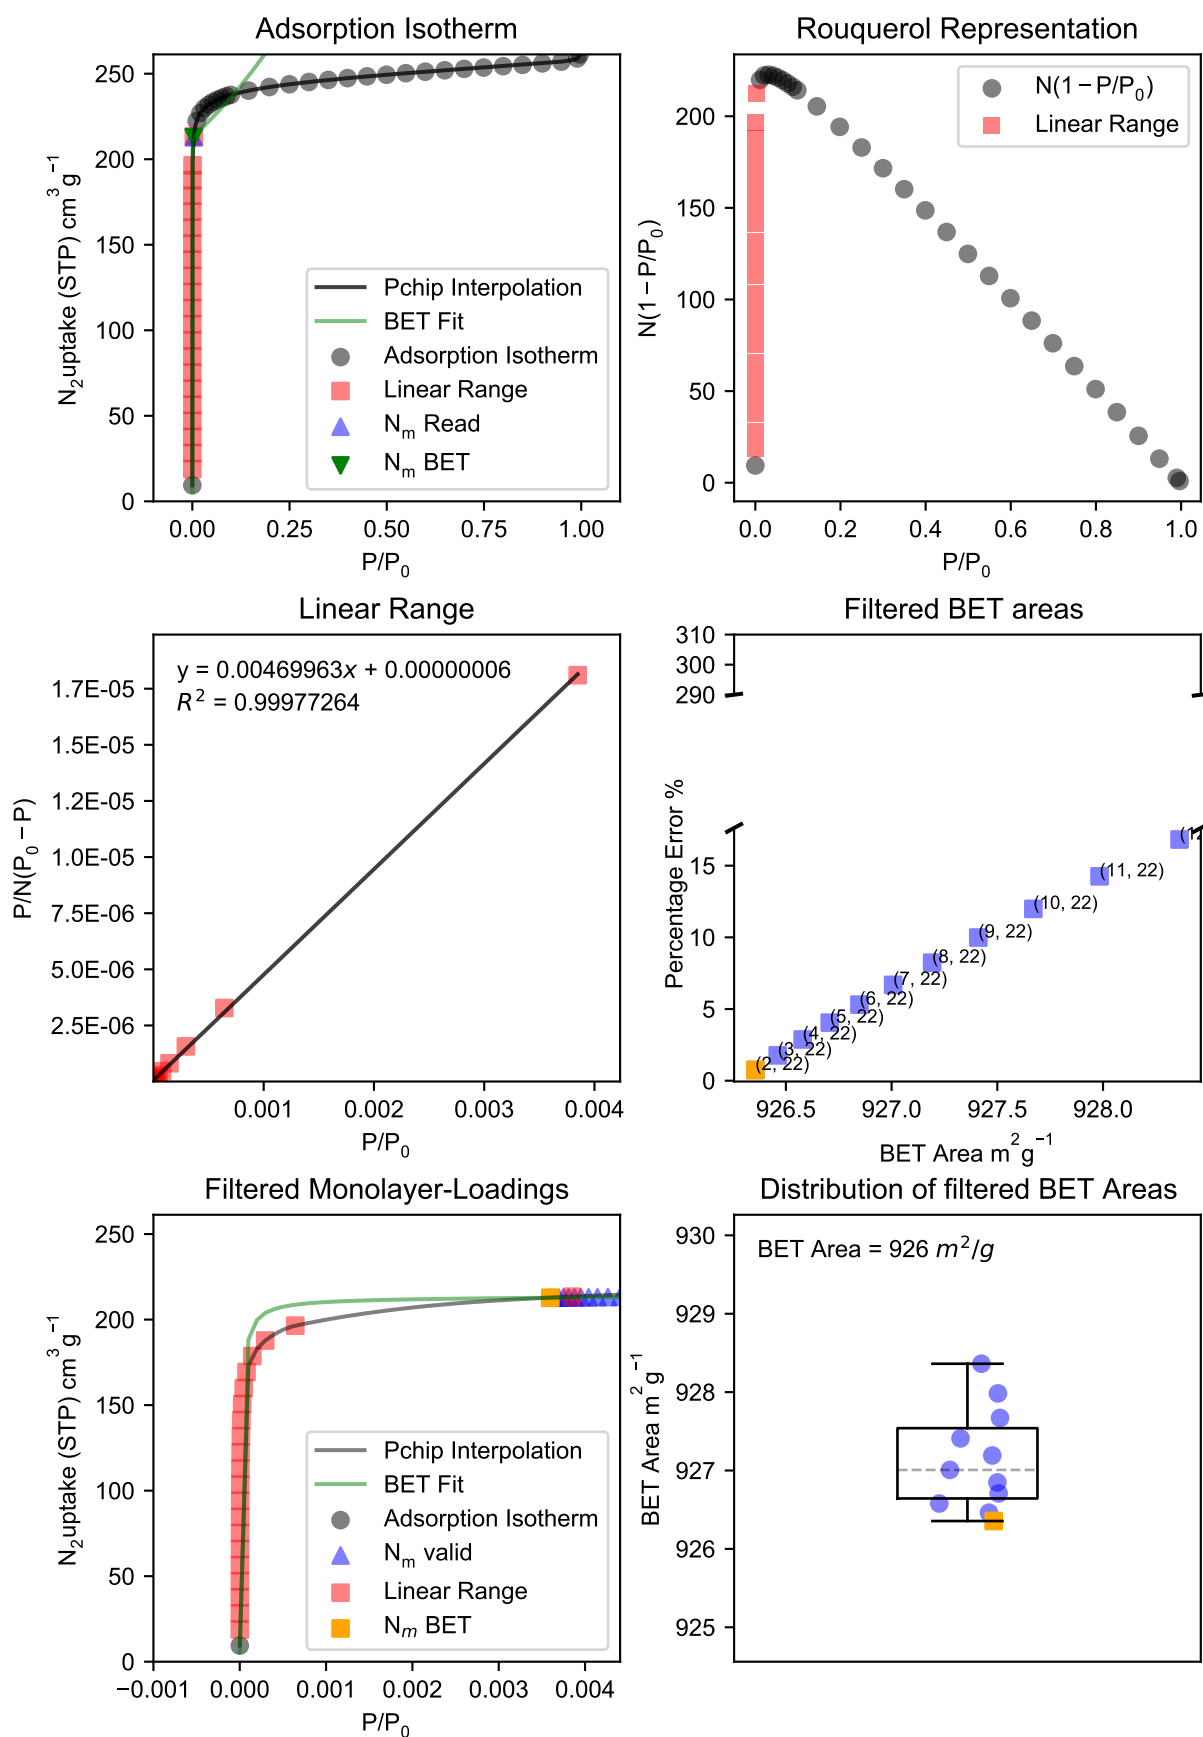

Fig. S25: BETSI analysis for VRnzZ-100-630.

### BETSI Analysis for VRnzZ-50-630

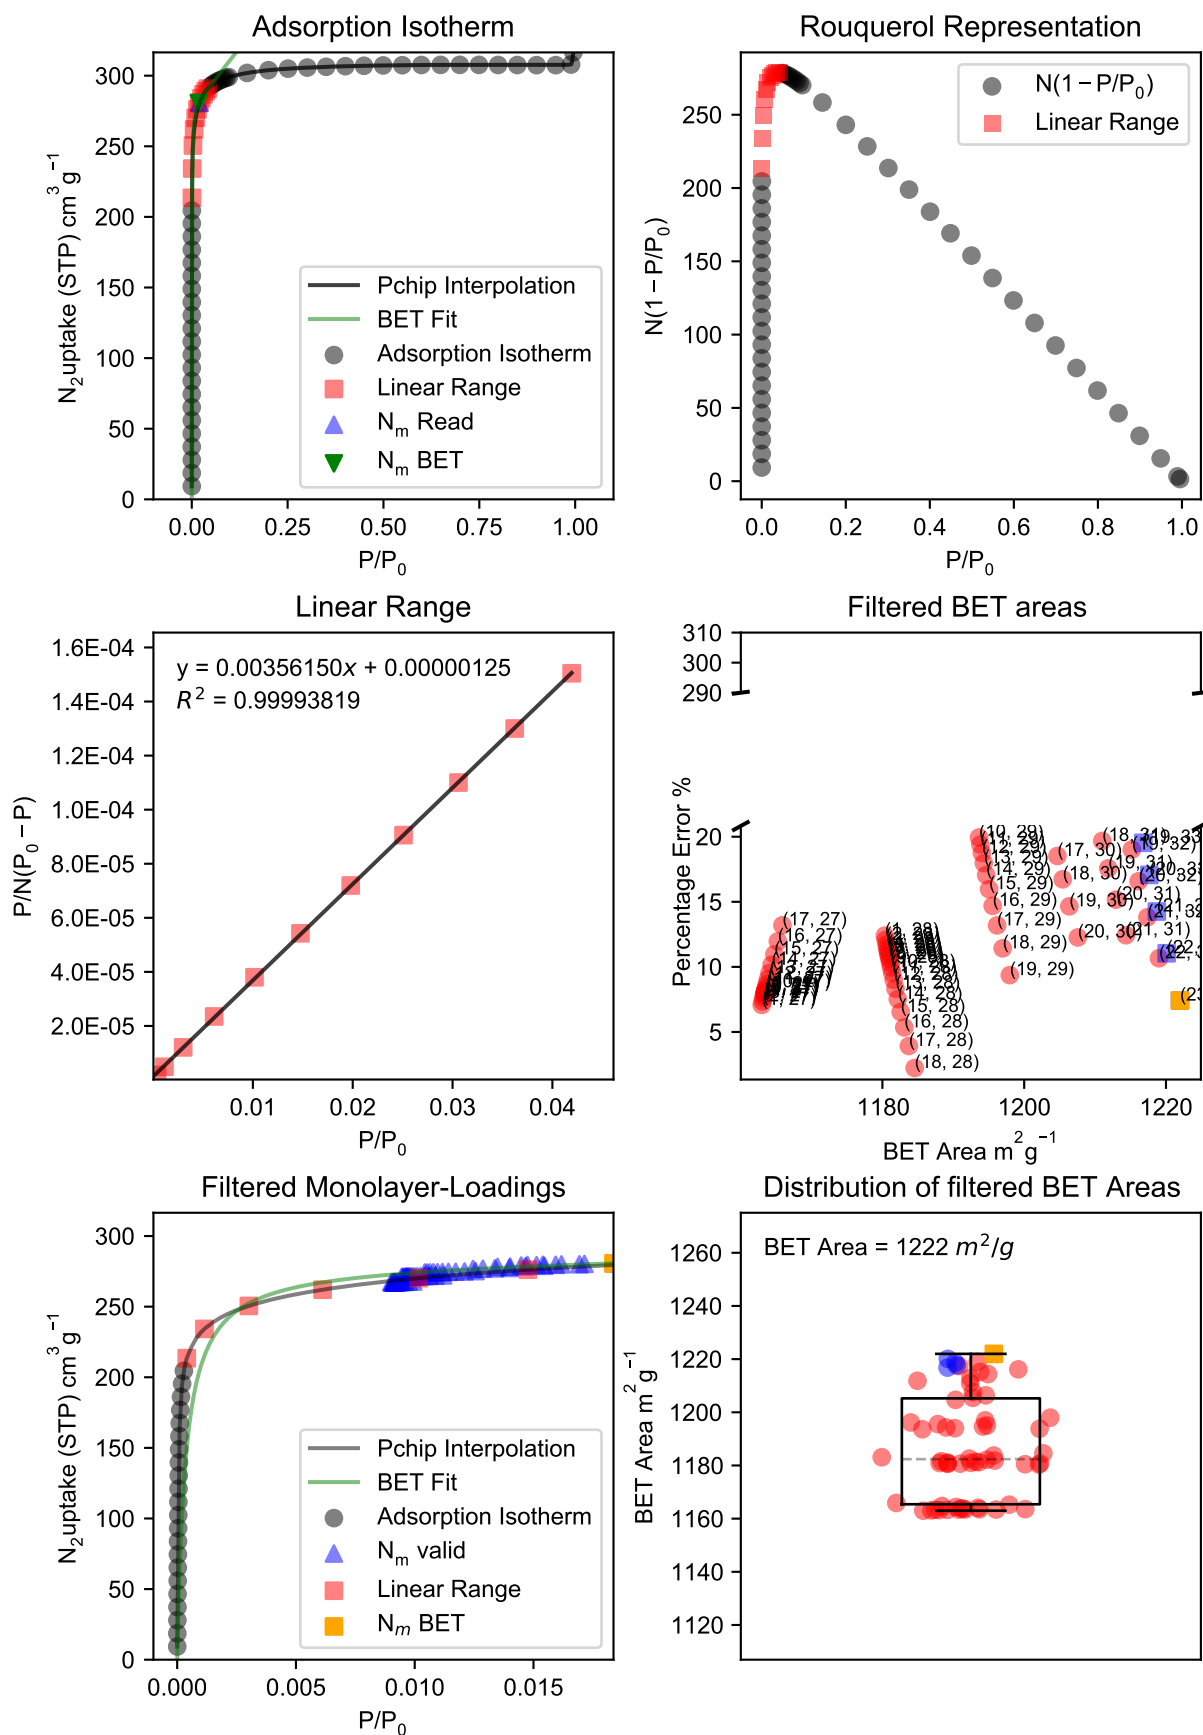

Fig. S26: BETSI analysis for VRnzZ-50-630.

### BETSI Analysis for VRnzZ-50-700

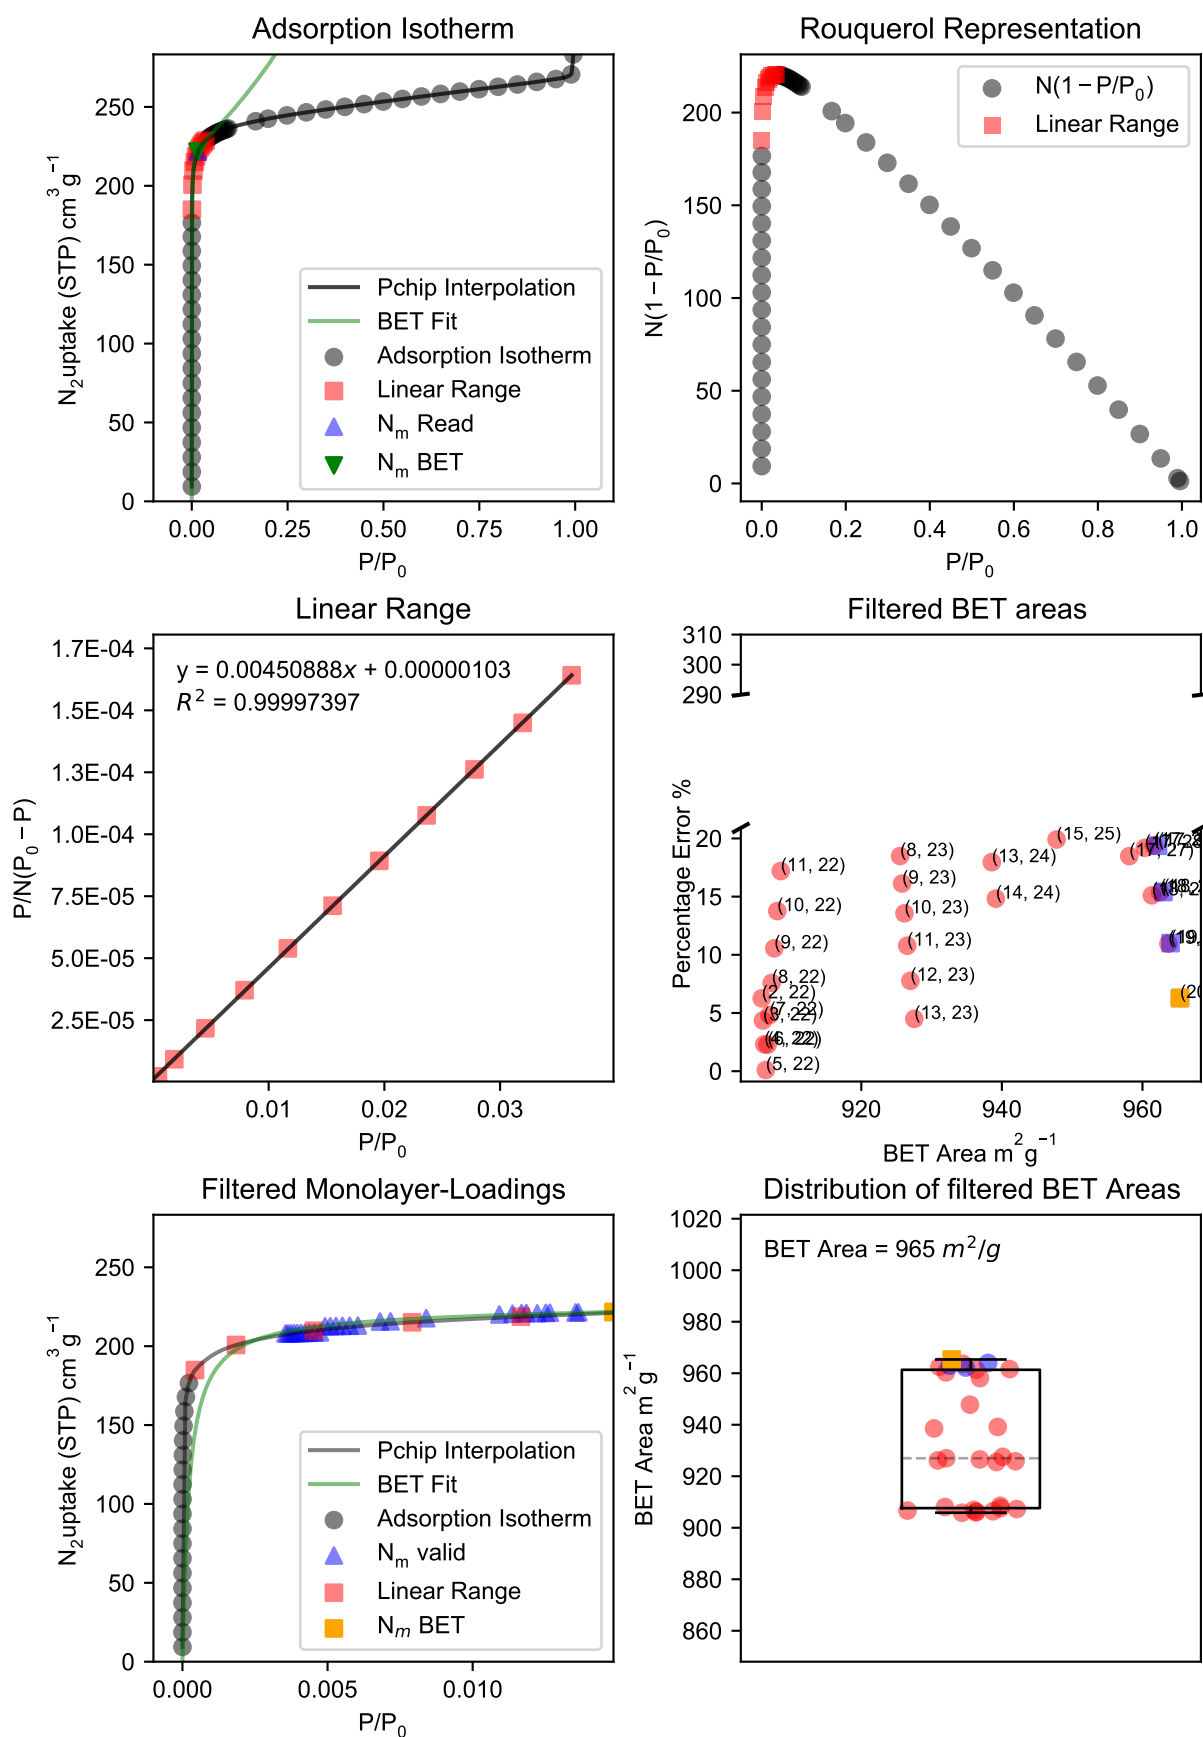

Fig. S27: BETSI analysis for VRnzZ-50-700.

## 7. PSD determination

PSDs and fits of isotherms to 2D-NLDFT heterogeneous surface kernel<sup>S3</sup> are included on the following pages.

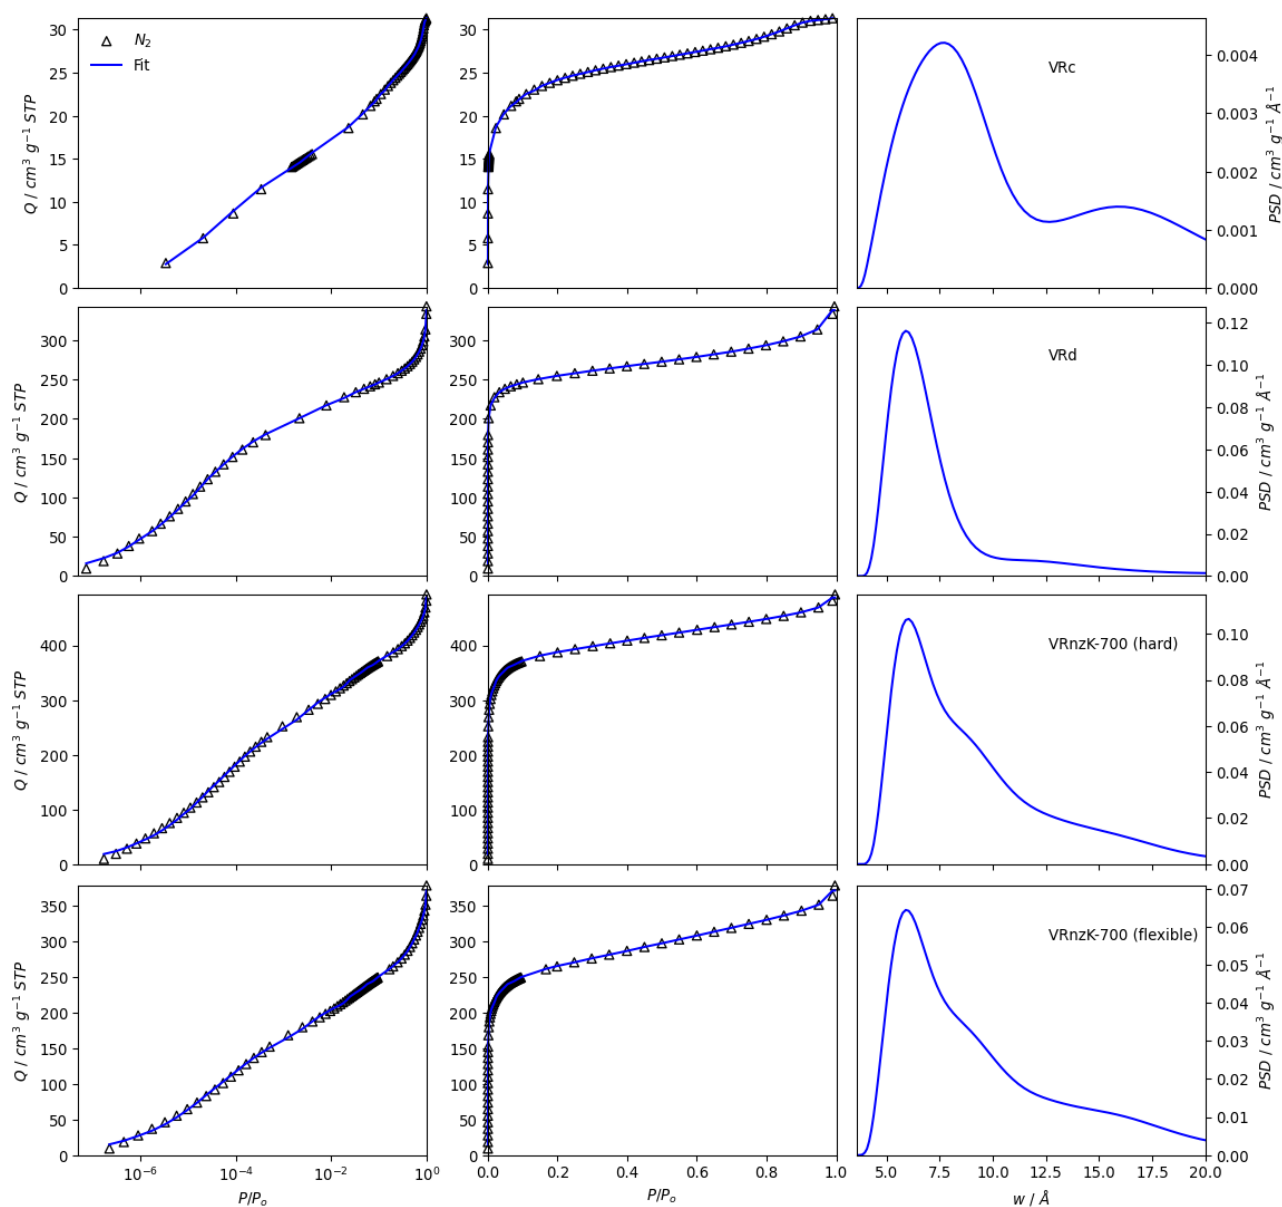

Fig. S28: Fits of  $N_2$  isotherms of samples VRc, VRd, as well as hard and flexible portions of VRnzK-700.

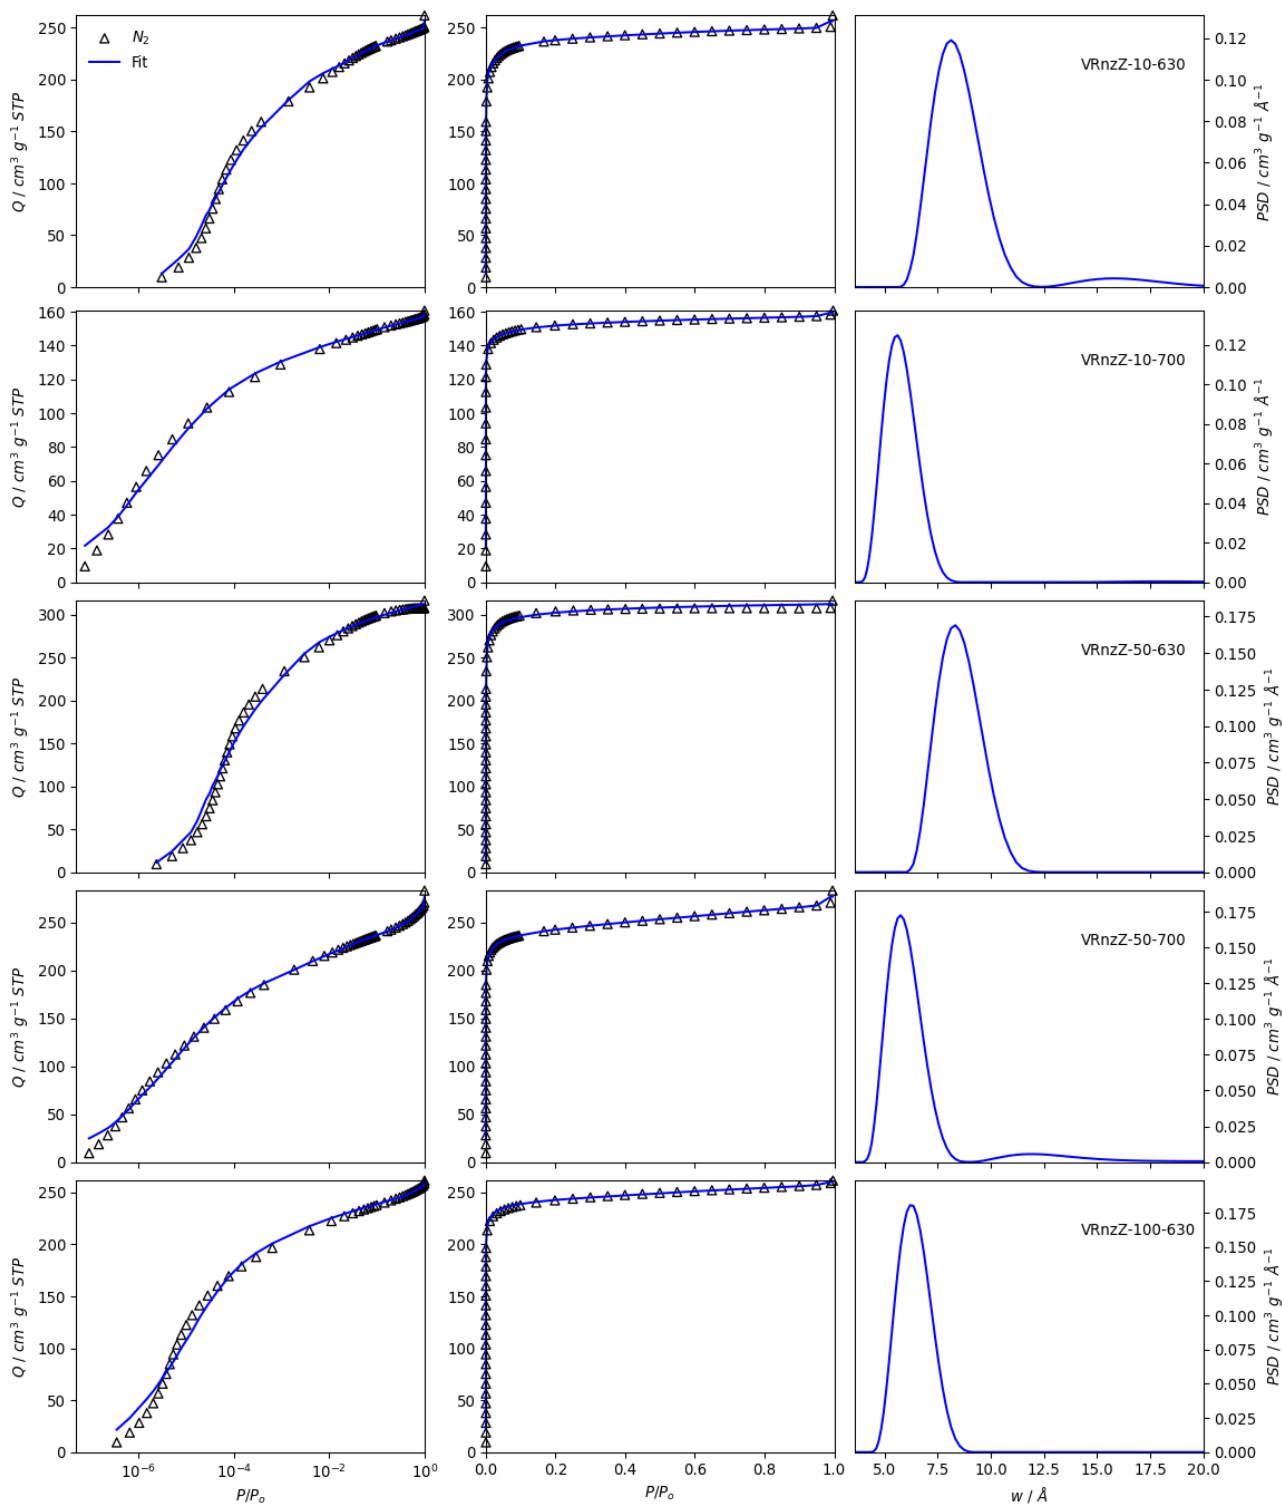

Fig. S29: Fits of  $N_2$  isotherms of samples in set VRnZ-X-T.

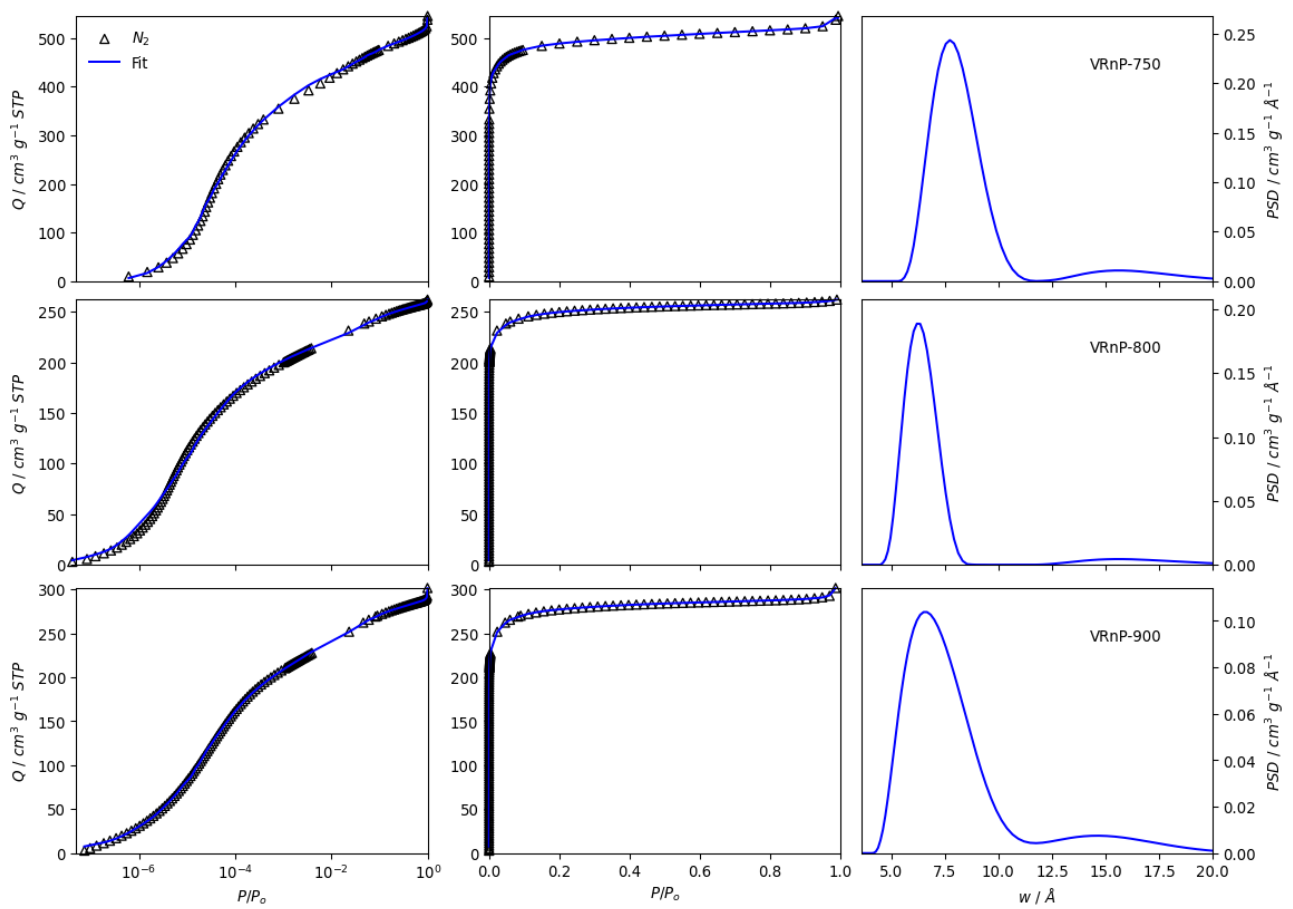

Fig. S30: Fits of  $\text{N}_2$  isotherms of samples in set VRnP-T.



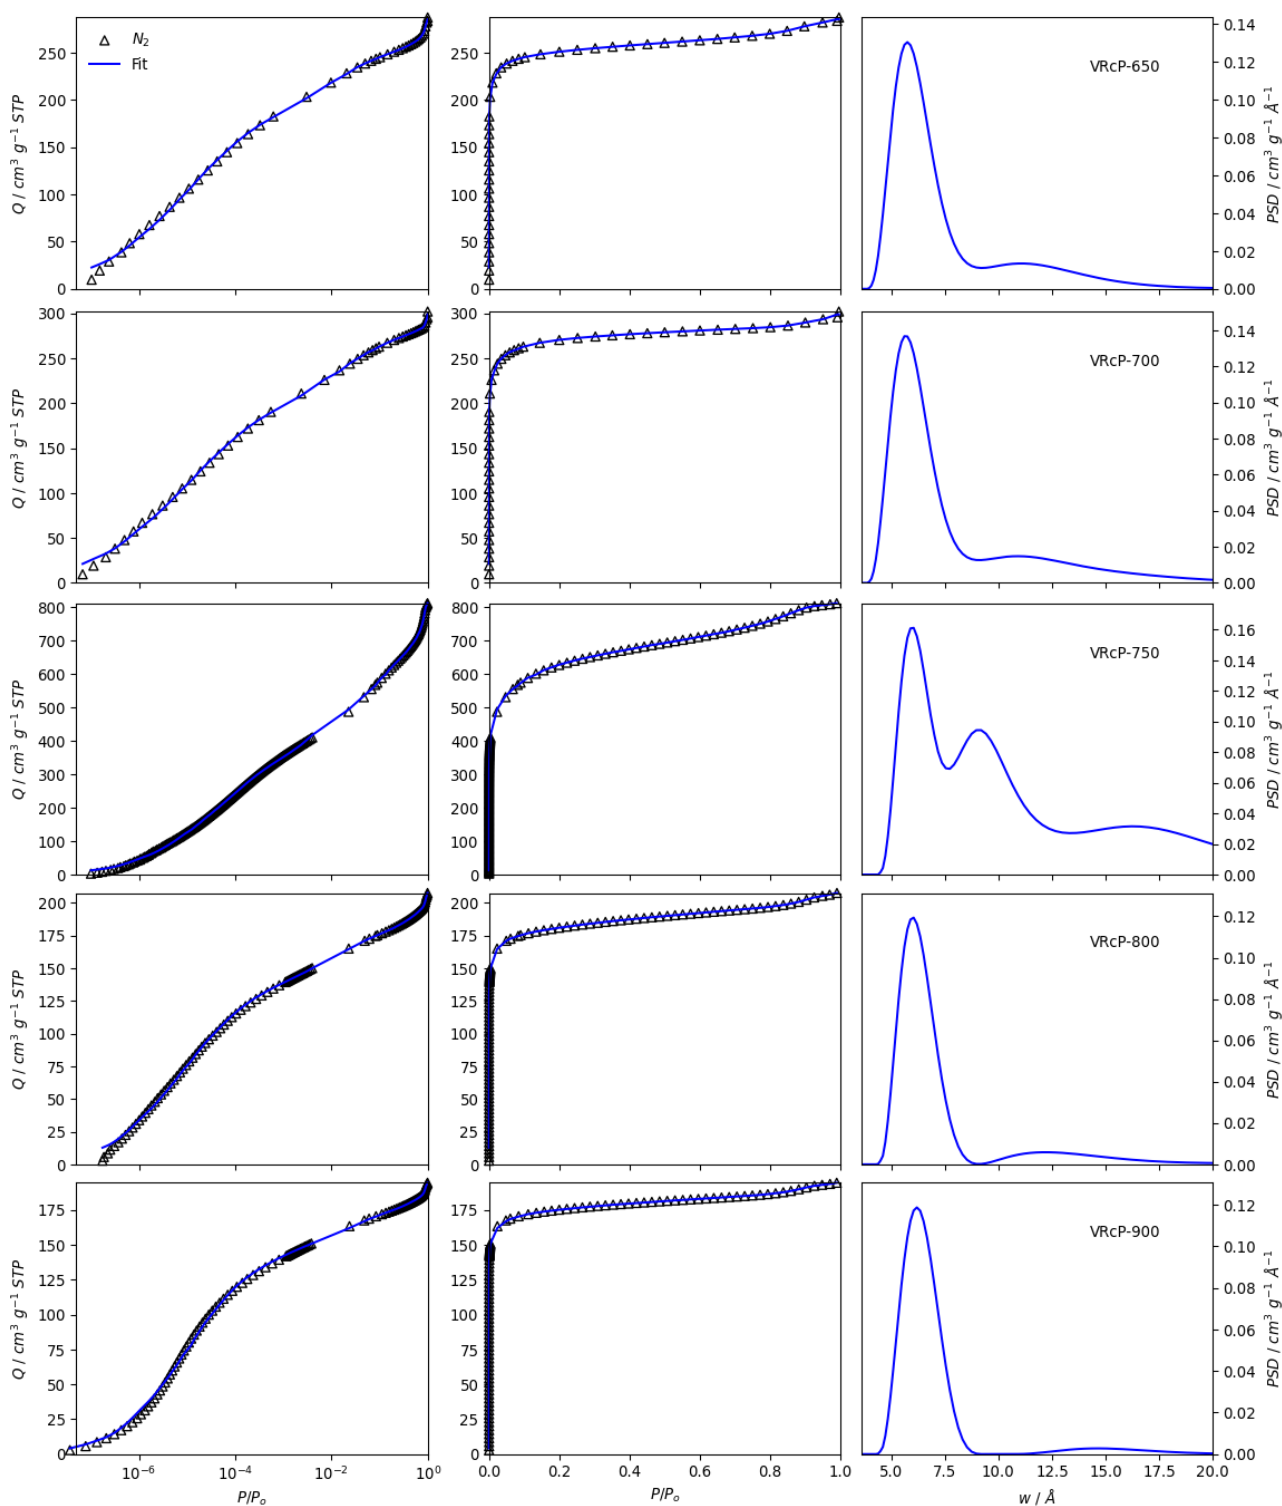

Fig. S31: Fits of  $N_2$  isotherms of samples in set VRcP-T.

## 8. Gas uptake

This section contains comparison of CO<sub>2</sub> and CH<sub>4</sub> uptakes of the carbons in this work to those in the literature (table S3), as well as all gravimetric uptake isotherms and fits to models (figures S32, S33).

**Table S3:** Tabulated excess uptake of CO<sub>2</sub> and total uptake of CH<sub>4</sub> at 25 °C and various pressures (bar), of selected samples produced in the work and ACCs in the literature.

| Sample       | CO <sub>2</sub> uptake / mmol g <sup>-1</sup> |      |      | CH <sub>4</sub> uptake / mmol g <sup>-1</sup> |     |      | ref             |
|--------------|-----------------------------------------------|------|------|-----------------------------------------------|-----|------|-----------------|
|              | 1.0                                           | 20   | 40   | 1.0                                           | 20  | 35   |                 |
| VRcP-750     | 2.9                                           | 14.0 | 16.3 | 1.3                                           | 8.3 | 10.4 | this work       |
| VRnP-750     | 4.1                                           | 12.3 | 13.3 | 1.9                                           | 8.3 | 10.0 | this work       |
| VRnzZ-50-630 | 3.5                                           | 8.9  | 9.5  | 1.2                                           | 5.6 | 6.8  | this work       |
| C60-CC-PNP   |                                               | 14.3 |      |                                               | 7.5 |      | S4              |
| C30-CC-PNP   | 4.2                                           | 11.9 |      |                                               | 7.0 |      | S4              |
| ACC          | 2.0                                           |      |      | 0.7                                           |     |      | S5              |
| FIPC         | 2.8                                           |      |      | 1.3                                           |     |      | S6              |
| FIAC         | 1.7                                           |      |      |                                               |     |      | S6              |
| Cloth 1      |                                               | 6.0  |      |                                               |     |      | S7 (commercial) |
| Cloth 2      |                                               | 7.0  |      |                                               |     |      | S7 (commercial) |
| CC-CH        | 2.5                                           | 3.8  |      | 1.0                                           | 2.3 |      | S8              |
| C60-CCC-PNP  |                                               | 3.3  |      |                                               | 1.6 |      | S8              |
| C60-CFT-PNP  |                                               | 3.1  |      |                                               | 1.8 |      | S8              |

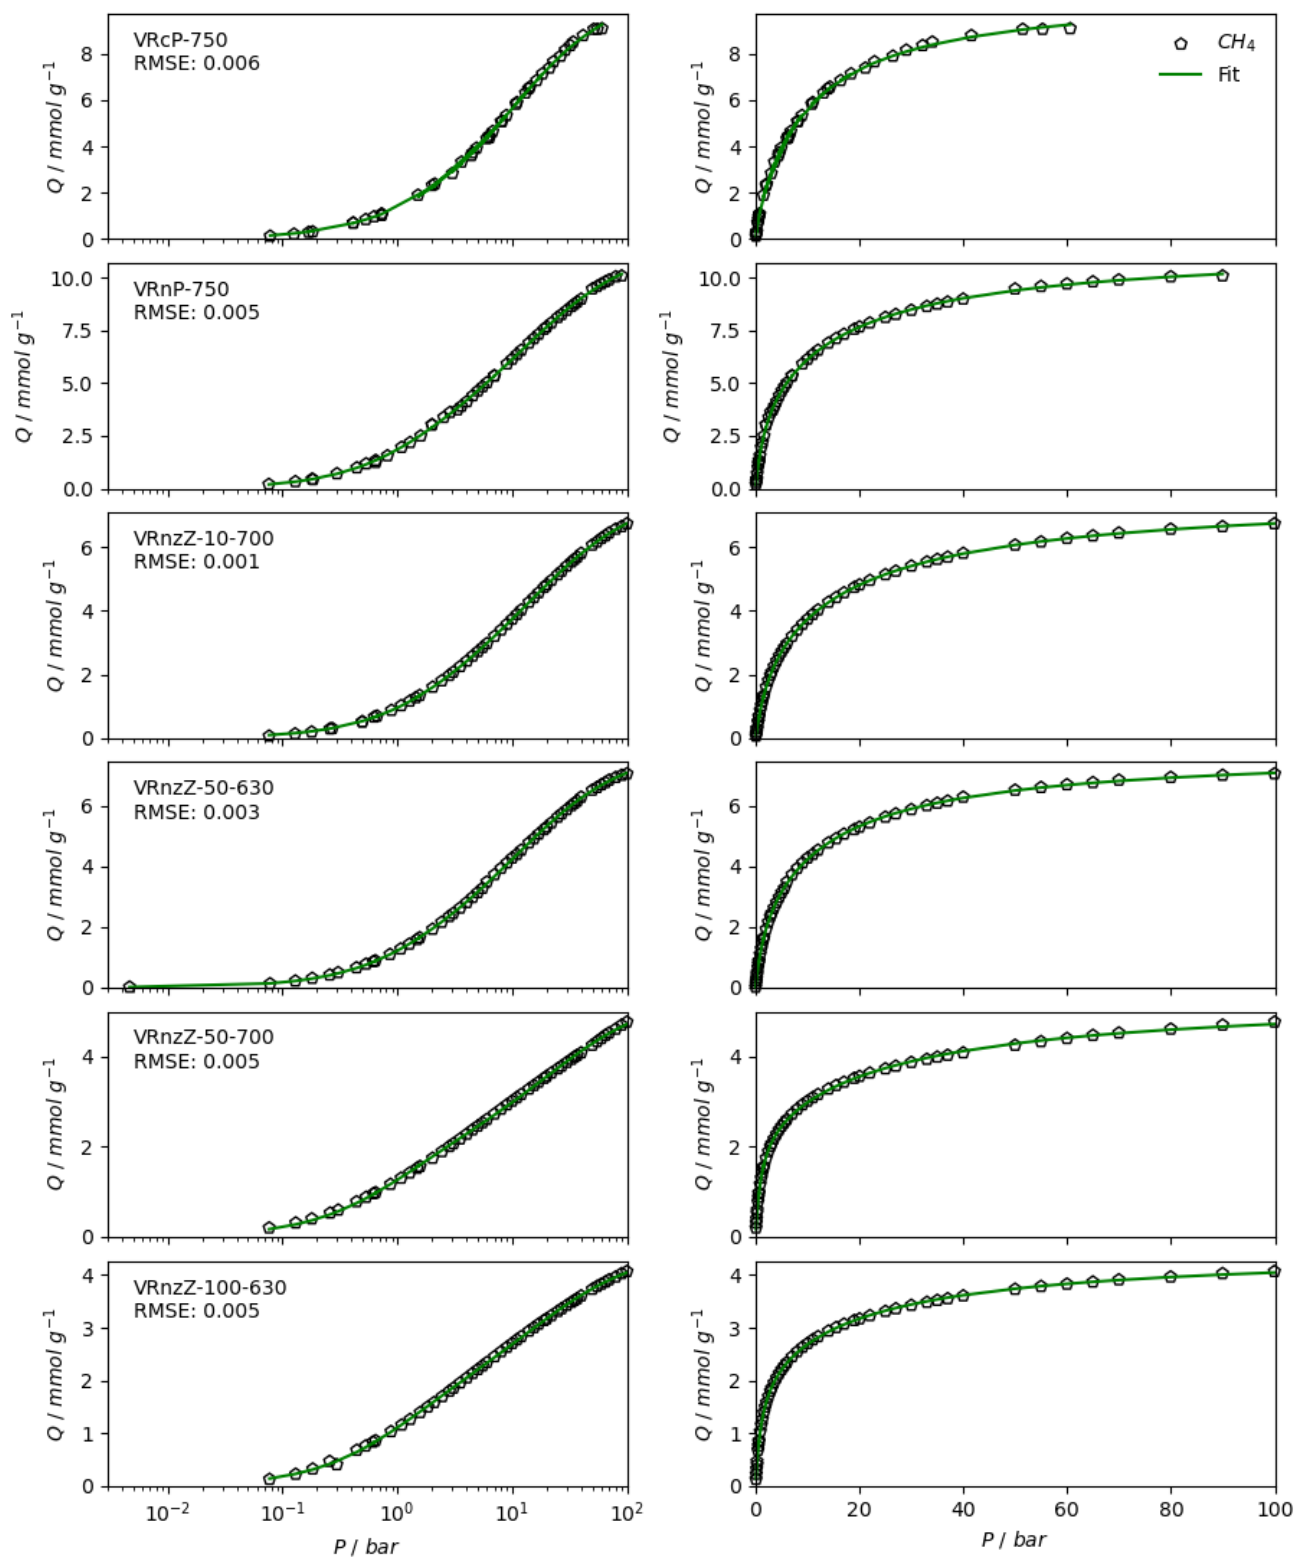

**Fig. S32:** Excess  $\text{CH}_4$  isotherms and fits to double site Langmuir<sup>S9</sup> model for purposes of extracting loadings at specific pressures. Where samples became saturated at some pressure, data after this is excluded for the purposes of the fit.

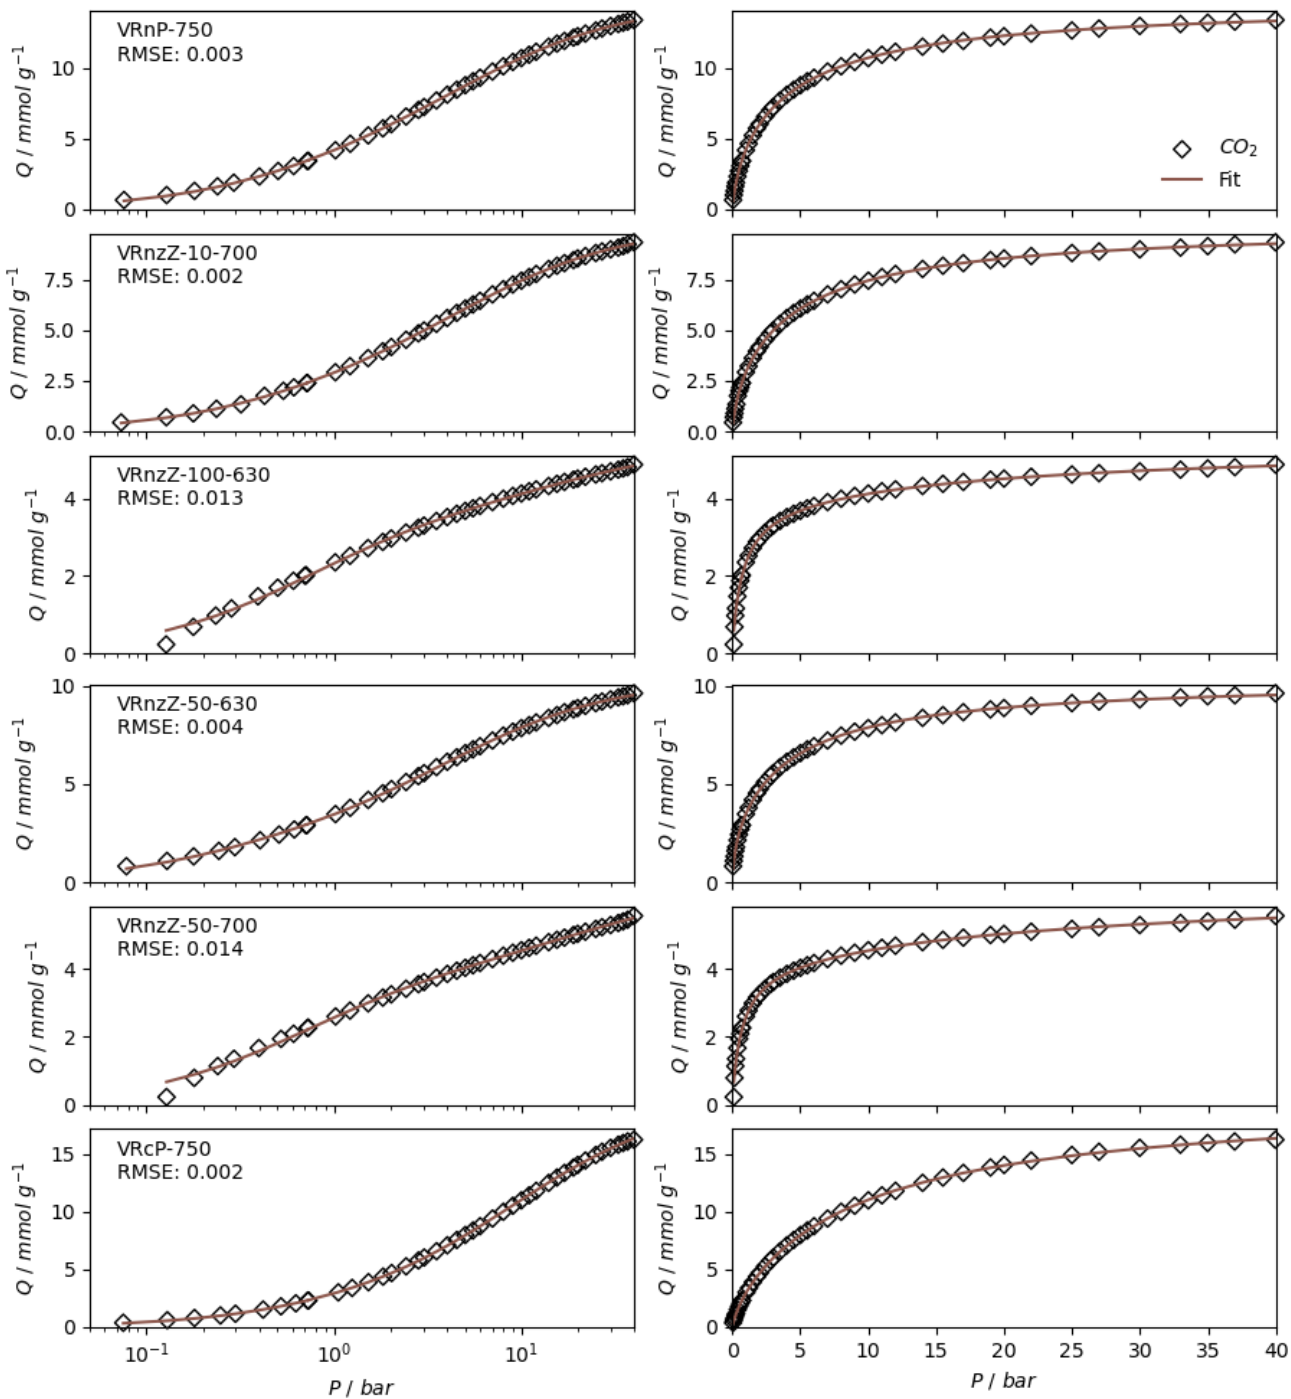

Fig. S33: Excess CO<sub>2</sub> isotherms and fits to double site Langmuir<sup>59</sup> model for purposes of extracting loadings at specific pressures.

## References

- (S1) Blankenship, L.S.; Jagiello, J.; and Mokaya, R. "Confirmation of pore formation mechanisms in biochars and activated carbons by dual isotherm analysis." *Materials Advances*, 2022. **3**(9):3961–3971
- (S2) Osterrieth, J.W.; Rampersad, J.; Madden, D.; Rampal, N.; Skoric, L.; Connolly, B.; Allendorf, M.D.; Stavila, V.; Snider, J.L.; Ameloot, R.; *et al.* "How reproducible are surface areas calculated from the BET equation?" *Advanced Materials*, 2022. p. 2201502
- (S3) Jagiello, J. and Olivier, J.P. "2D-NLDFT adsorption models for carbon slit-shaped pores with surface energetical heterogeneity and geometrical corrugation." *Carbon*, 2013. **55**:70–80
- (S4) Attia, N.F.; Jung, M.; Park, J.; Jang, H.; Lee, K.; and Oh, H. "Flexible nanoporous activated carbon cloth for achieving high H<sub>2</sub>, CH<sub>4</sub>, and CO<sub>2</sub> storage capacities and selective CO<sub>2</sub>/CH<sub>4</sub> separation." *Chemical Engineering Journal*, 2020. **379**:122367
- (S5) Kostoglou, N.; Koczwar, C.; Prehal, C.; Terziyska, V.; Babic, B.; Matovic, B.; Constantinides, G.; Tampaxis, C.; Charalambopoulou, G.; Steriotis, T.; Hinder, S.; Baker, M.; Polychronopoulou, K.; Doumanidis, C.; Paris, O.; Mitterer, C.; and Rebolz, C. "Nanoporous activated carbon cloth as a versatile material for hydrogen adsorption, selective gas separation and electrochemical energy storage." *Nano Energy*, 2017. **40**:49–64. doi:[10.1016/j.nanoen.2017.07.056](https://doi.org/10.1016/j.nanoen.2017.07.056)
- (S6) Rodríguez-Blanco, G.; Giraldo, L.; and Moreno-Piraján, J.C. "Carbon molecular sieves from carbon cloth: Influence of the chemical impregnant on gas separation properties." *Applied Surface Science*, 2010. **256**:5221–5225. doi:[10.1016/j.apsusc.2009.12.107](https://doi.org/10.1016/j.apsusc.2009.12.107)
- (S7) Lozano-Castello, D.; Monge, J.A.; Lillo, M.; Amoros, D.; and Solano, A. "Advances in the study of methane storage in porous carbonaceous materials." *Fuel*, 2002. **81**(14):1777–803
- (S8) Jung, M.; Park, J.; Cho, S.Y.; Elashery, S.E.; Attia, N.F.; and Oh, H. "Flexible carbon sieve based on nanoporous carbon cloth for efficient CO<sub>2</sub>/CH<sub>4</sub> separation." *Surfaces and Interfaces*, 2021. **23**:100960
- (S9) Langmuir, I. "The adsorption of gases on plane surfaces of glass, mica and platinum." *Journal of the American Chemical Society*, 1918. **40**(9):1361–1403
